1 **Prognostic biomarkers of intracerebral hemorrhage identified using**  
2 **targeted proteomics and machine learning algorithms**

3

4 **Short title: Predictive biomarkers of ICH: Unveiling insights with proteomics &**  
5 **machine learning**

6

7 **Authors:** Shubham **Misra**<sup>1,2</sup>, Yuki **Kawamura**<sup>2,3</sup>, Praveen **Singh**<sup>4</sup>, Shantanu **Sengupta**<sup>4</sup>,  
8 Manabesh **Nath**<sup>1</sup>, Zuhaibur **Rahman**<sup>4</sup>, Pradeep **Kumar**<sup>1</sup>, Amit **Kumar**<sup>1,5</sup>, Praveen  
9 **Aggarwal**<sup>6</sup>, Achal K. **Srivastava**<sup>1</sup>, Awadh K. **Pandit**<sup>1</sup>, Dheeraj **Mohania**<sup>7</sup>, Kameshwar  
10 **Prasad**<sup>1</sup>, Nishant K. **Mishra**<sup>2</sup>, Deepti **Vibha**<sup>1\*</sup>

11

12 **Affiliations:**

13 <sup>1</sup>Department of Neurology, All India Institute of Medical Sciences, New Delhi, India

14 <sup>2</sup>Department of Neurology, Yale University School of Medicine, New Haven, CT

15 <sup>3</sup>School of Clinical Medicine, University of Cambridge, Cambridge, United Kingdom

16 <sup>4</sup>CSIR-Institute of Genomics and Integrative Biology, New Delhi, India

17 <sup>5</sup>Department of Laboratory Medicine, Rajendra Institute of Medical Sciences, Ranchi,  
18 India

19 <sup>6</sup>Department of Emergency Medicine, All India Institute of Medical Sciences, New Delhi,  
20 India

21 <sup>7</sup>Department of Dr. RP Centre, All India Institute of Medical Sciences, New Delhi, India

22

23 **Corresponding author details:**

24

**NOTE:** This preprint reports new research that has not been certified by peer review and should not be used to guide clinical practice.

25 **Prof. Dr. Deepti Vibha**

26 DM (Neurology, AIIMS, New Delhi), MSc (Clinical Epidemiology, Erasmus MC,

27 Netherlands)

28 Professor of Neurology

29 Room No.: 707, 7<sup>th</sup> Floor

30 Neurosciences Centre, Department of Neurology,

31 All India Institute of Medical Sciences, Ansari Nagar, New Delhi, India

32 **PH:** +91-11-26594485

33 **Email ID:** [deeptivibha@gmail.com](mailto:deeptivibha@gmail.com)

34

35 **Word Count:** 2942

36 **Total tables:** 5

37 **Total figures:** 4

38 **Keywords:** Intracerebral Hemorrhage; Proteomics; Blood biomarkers; Prognosis;

39 Mortality; Poor outcome.

40

41

42 **Abstract**

43 Early prognostication of patient outcomes in intracerebral hemorrhage (ICH) is critical  
44 for patient care. We aim to investigate protein biomarkers' role in prognosticating  
45 outcomes in ICH patients. We assessed 22 protein biomarkers using targeted proteomics  
46 in serum samples obtained from the ICH patient dataset (N=150). We defined poor  
47 outcomes as modified Rankin scale score of 3-6. We incorporated clinical variables and  
48 protein biomarkers in regression models and random forest-based machine learning  
49 algorithms to predict poor outcomes and mortality. We report Odds Ratio (OR) or Hazard  
50 Ratio (HR) with 95% Confidence Interval (CI). We used five-fold cross-validation and  
51 bootstrapping for internal validation of prediction models. We included 149 patients for  
52 90-day and 144 patients with ICH for 180-day outcome analyses. In multivariable logistic  
53 regression, UCH-L1 (aOR 9.23; 95%CI 2.41-35.33), alpha-2-macroglobulin (5.57; 1.26-  
54 24.59), and Serpin-A11 (9.33; 1.09-79.94) were independent predictors of 90-day poor  
55 outcome; MMP-2 (6.32; 1.82-21.90) was independent predictor of 180-day poor  
56 outcome. In multivariable Cox regression models, IGFBP-3 (aHR 2.08; 1.24-3.48)  
57 predicted 90-day and MMP-9 (1.98; 1.19-3.32) predicted 180-day mortality. Using  
58 machine learning, UCH-L1 and APO-C1 predicted 90-day mortality, and UCH-L1, MMP-9,  
59 and MMP-2 predicted 180-day mortality. Overall, random forest models outperformed  
60 regression models for predicting 180-day poor outcomes (AUC 0.89), and 90-day (AUC  
61 0.81) and 180-day mortality (AUC 0.81). Serum biomarkers independently predicted  
62 short-term poor outcomes and mortality after ICH. Further research utilizing a multi-  
63 omics platform and temporal profiling is needed to explore additional biomarkers and  
64 refine predictive models for ICH prognosis.

65

66 **Abbreviations:**

67 ICH: Intracerebral Hemorrhage; IVH: Intraventricular hemorrhage; OR: Odds Ratio; HR:  
68 Hazard Ratio; CI: Confidence Interval; IQR: Interquartile range; AUC: Area Under the  
69 Curve; NIHSS: National Institutes of Health Stroke Scale; GCS: Glasgow Coma Scale; mRS:  
70 modified Rankin Scale; SBP: Systolic Blood Pressure; DBP: Diastolic Blood Pressure; TLC:  
71 Total Leucocyte Count; RBS: Random Blood Sugar; A2M: Alpha-2-Macroglobulin, UCH-L1:  
72 Ubiquitin carboxyl-terminal hydrolase isozyme L1; MMP: Matrix Metalloproteinase; APO:  
73 Apolipoprotein; IGFBP-3: Insulin-like growth factor-binding protein-3.

74

## 75 **Introduction**

76 Intracerebral hemorrhage (ICH) comprises 10-15% of all strokes [1], with one-month  
77 mortality of 40%, rendering it the deadliest stroke subtype [2]. It is a significant  
78 healthcare challenge worldwide, and its impact is particularly pronounced in developing  
79 nations like India. Limited healthcare resources, disparities in access to care, and unique  
80 demographic and epidemiological factors exacerbate the burden of ICH in these regions  
81 [3]. Understanding factors influencing ICH patient outcomes is crucial for optimizing  
82 clinical management, risk stratification, and resource allocation. While various clinical  
83 scores exist for predicting functional outcomes and mortality in ICH [4], such as the  
84 widely-used ICH score,<sup>5</sup> their accuracy for outcomes beyond hospital discharge or 30  
85 days remains uncertain. Hence, there is a critical need for robust prediction models that  
86 integrate new predictor variables to improve ICH prognostication [5]. Serum biomarkers  
87 have emerged as promising candidates with the potential to enhance outcome  
88 prognostication in ICH patients [6]. Integrating serum biomarkers with clinical variables  
89 in prediction models may provide additional prognostic information and guide treatment  
90 decisions.

91 Therefore, we undertook this study to build prognostic models using protein biomarkers  
92 to predict poor functional outcomes and mortality in ICH patients within 24 hours of  
93 symptom onset utilizing targeted proteomics, regression modeling, and machine learning  
94 approaches.

95

## 96 **Methods**

### 97 **Study sample**

98 We used clinical and proteomic data lodged within a prospective cohort study from a  
99 collaborative effort of the Department of Neurology, All India Institute of Medical

100 Sciences (AIIMS), and the Institute of Genomics and Integrative Biology in New Delhi,  
101 India. The study database includes consecutive ICH patients aged  $\geq 18$  years, recruited  
102 between 04 October 2017 and 20 March 2020 within 24 hours of symptom onset. The  
103 details of this study protocol are reported in prior publications [7,8]. We obtained written  
104 informed consent from all the recruited patients or their legally authorized  
105 representatives prior to collecting blood samples and clinical history. The study was  
106 approved by the Local Institutional Ethics Committee of AIIMS, New Delhi (Ref. No.  
107 IECPG-395/28.09.2017).

108

### 109 **Outcomes**

110 We defined poor outcomes as a modified Rankin Scale (mRS) score of 3-6. Our second  
111 outcome measure was mortality. The outcomes were ascertained by a researcher blinded  
112 to clinical data using telephonic interviews at 90 and 180 days post-ICH.

113

### 114 **Blood sample collection**

115 Five ml of peripheral blood sample was taken in serum vacutainer tubes from ICH  
116 patients. For serum collection, it was left standing at room temperature for 30 minutes  
117 until clotted. It was then centrifuged at 3000g for 10 minutes, after which the serum was  
118 separated into cryovials. Five aliquots of each sample (100 $\mu$ l) were prepared and stored  
119 at -80°C until further analysis.

120

### 121 **Sample preparation**

122 Ten  $\mu$ l of serum samples were used for protein precipitation. To 90 $\mu$ l of 1X Phosphate  
123 Buffer Saline (PBS), 10  $\mu$ l serum was added and vortex mixed. Protein precipitation was  
124 performed using pre-chilled acetone. Briefly, to 100  $\mu$ l protein extract, four times volume

125 of pre-chilled acetone was added, vortex mixed and centrifuged at 15000 g for 10 minutes  
126 at 4°C. The supernatant was discarded, and the protein pellets were air-dried at room  
127 temperature and suspended in 0.1 M Tris-HCl with 8M urea, pH 8.5. Protein quantitation  
128 was performed using the Bradford assay.

129

### 130 **Reduction, Alkylation, and Trypsin Digestion**

131 A total of 20 µg of protein from each sample was reduced with 25 mM of Dithiothreitol  
132 (DTT) for 30 minutes at 60°C, followed by alkylation using 55 mM of Iodoacetamide (IAA)  
133 at room temperature (in the dark) for 30 minutes. These samples were then subjected to  
134 trypsin digestion in an enzyme to substrate ratio of 1:10 (trypsin: protein) for 16-18  
135 hours at 37°C. Finally, the tryptic peptides were vacuum dried in vacuum concentrator.

136

### 137 **Peptide selection for Multiple Reaction Monitoring (MRM)-based targeted** 138 **proteomics**

139 Peptide selection was performed using search results from ProteinPilot [9], PeptideAtlas  
140 [10] or in-silico generated peptides of proteins using Expsy PeptideCutter tool [11].  
141 Peptides with +2 and +3 charges were considered for MRM and for each peptide, 5-6  
142 fragment ions were used for identification (Table S1).

143

### 144 **Multiple Reaction Monitoring (MRM) data acquisition**

145 Tryptic peptides obtained after digestion were desalted using reversed phase cartridges  
146 Oasis HLB cartridge (Waters, Milford, MA) according to the following procedure: wet  
147 cartridge with 1 × 1,000 µl of 100% acetonitrile, equilibrate with 1 × 1,000 µl of 0.1%  
148 formic acid, load acidified digest, washed peptides with 1 × 1,000 µl of 0.1% formic acid  
149 and elute with 1 × 1000 µl of 70% acetonitrile in 0.1% formic acid. The peptide mixture

150 was dried using a vacuum centrifuge, and the peptides were resuspended in 0.1% formic  
151 acid at a final concentration of 1 µg/µl. A heavy labeled peptide for Apo A1  
152 (QGLLPVLESFK; K=Lysine-13C6,15N2) protein was spiked-in the resolubilized plasma  
153 digest at a final concentration of 1 ng/µl.

154 The targeted MRM-MS [12] analysis of the tryptic peptides was performed on a TSQ  
155 Altis (Thermo Fisher, San Jose, CA). The instrument was equipped to an H-ESI ion source.  
156 A spray voltage of 3.5 keV was used with a heated ion transfer tube set at a temperature  
157 of 325°C. Chromatographic separations of peptides were performed on Vanquish UHPLC  
158 system (Thermo Fisher, San Jose, CA).

159 The 10 µl of the sample was injected and peptides were loaded on an ACQUITY UPLC BEH  
160 C18 column (130Å, 1.7 µm, 2.1 mm X 100 mm, Waters) from a cooled (4 °C) autosampler  
161 and separated with a linear gradient of water (buffer A) and acetonitrile (buffer B),  
162 containing 0.1% formic acid, at a flow rate of 300 µl/minute in 30 minutes gradient run  
163 with the buffer conditions given in Table S2.

164 The mass spectrometer was operated in Selected Reaction Monitoring (SRM) mode. For  
165 SRM acquisitions, the first quadrupole (Q1) and the third quadrupole (Q3) were operated  
166 at 0.7 and 0.7 unit mass resolution, respectively. A dwell time of 6.175 milliseconds (ms)  
167 was chosen, and acquisitions occurred over the whole gradient of 30 minutes. Argon was  
168 used as the collision gas at a nominal pressure of 1.5 mTorr. Optimized collision energies  
169 were used for each peptide.

170

## 171 **Bioinformatic and Statistical analyses**

172 We analyzed the MRM-based targeted proteomics data using Skyline version 21.1 [13].  
173 Peptide areas were spike-in normalized using a heavy labeled peptide for Apo A1 protein  
174 and log<sub>2</sub> transformed. Peptides with <10% missing values were imputed using a random-



175 forest-based missing value imputation method. Non-biological experimental variations  
176 were removed through batch correction.

177 Our study adhered to the Transparent reporting of a multivariable prediction model for  
178 individual prognosis or diagnosis (TRIPOD) guidelines [14]. We performed univariable  
179 logistic regression analysis using odds ratio (OR) and 95% confidence interval (CI) to  
180 assess poor outcomes during follow-up. Mortality rates were evaluated through Kaplan-  
181 Meier survival curves, and we constructed simple Cox proportional hazard models with  
182 hazard ratios (HR) and 95% CI. We conducted receiver operating characteristic (ROC)  
183 curve analyses and determined optimal cut-off points for each biomarker using the  
184 Youden Index (sensitivity + specificity-1).

185 Regression-based ICH outcome prediction models: We developed prediction models to  
186 determine independent predictors of poor outcomes and mortality in ICH. Variables with  
187 p-value <0.1 in the univariable analysis, along with demographic variables like age and  
188 sex, were included in a backward stepwise multiple logistic regression or multiple Cox  
189 regression analyses. Multicollinearity among predictor variables was assessed using the  
190 variance inflation factor (VIF), and predictors with a VIF value exceeding 2.5 were  
191 removed from the model. We evaluated the discrimination ability using the area under  
192 the curve (AUC) or c-statistic.

193 Machine Learning-based ICH outcome prediction models: We employed a random forest-  
194 based machine learning algorithm to identify additional predictors. Categorical data were  
195 encoded in binary form, while continuous data were standardized based on the  
196 population mean and standard deviation following log-normalization for skewed  
197 distributions. Train-test splits were executed in a 7:3 ratio, and random forest models  
198 with 1000 estimators were trained using the scikit-learn package. This process was  
199 repeated 1000 times, with each iteration involving a new random seed to choose the top

200 10 variables for prediction. Shapley values were computed using the SHAP package, and  
201 absolute means were utilized to evaluate variable importance.

202 Internal validation: We internally validated our prediction models using bootstrapping  
203 and 5-fold cross-validation.

204 We conducted statistical analyses using STATA software (Version 18) and R version 3.6.2.

205 We conducted interaction network and enrichment analyses of significant biomarkers  
206 using Cytoscape version 3.10.0.

207

## 208 **Data availability**

209 The mass spectrometry proteomics data have been deposited to the ProteomeXchange  
210 Consortium via the PRIDE [15] partner repository with the dataset identifier PXD032917.

211

## 212 **Results**

213 The study cohort included 150 ICH patients recruited within 24 hours of ICH onset. Loss  
214 to follow-up at 90 days was 5% (n=1), and at 180 days was 7.33% (n=6). Therefore, we  
215 included 149 patients for the 90-day and 144 for the 180-day outcome analyses.

216

### 217 **Poor outcome at 90-day and 180-day**

218 Of 149 ICH patients, 110 (73.82%) had a poor outcome at 90 days, and of 144 ICH  
219 patients, 97 (67.36%) had a poor outcome at 180 days. See Table 1 for clinical variables  
220 and Table S3 for protein biomarkers significantly associated with poor outcomes in the  
221 univariable analysis ( $p < 0.1$ ).

222 Multivariable logistic regression identified lower UCH-L1 (adjusted OR 9.23; 95%CI 2.41-  
223 35.33), higher alpha-2-macroglobulin (aOR 5.57, 95%CI 1.26-24.59) and Serpin A11  
224 levels (aOR 9.33; 95%CI 1.09-79.94) as independent predictors of 90-day poor outcome;

225 whereas higher MMP-2 levels (aOR 6.32, 95%CI 1.82-21.90) independently predicted  
226 180-day poor outcome among other clinical predictors. The models had an AUC of 0.95  
227 at 90 days and 0.92 at 180 days (Figure 1a, b and Table 3).

228 Top 10 important predictors identified by random forest algorithms for 90-day outcome  
229 included NIHSS score, ICH volume, age, UCH-L1, platelet count, RBS, alpha-2-  
230 macroglobulin, TLC, serpin A11, and haptoglobin (Figure 2a). Top 10 important  
231 predictors of 180-day poor outcome included NIHSS score, ICH volume, TLC, age, alpha-  
232 2-macroglobulin, creatinine, blood urea, UCH-L1, Serpin A11, and time taken to reach  
233 hospital (Figure 2b).

234

### 235 **Mortality at 90-day and 180-day**

236 Mortality at 90 days was observed in 62 (41.61%) of 149 ICH patients and at 180 days in  
237 67 (46.53%) of 144 ICH patients. See Table 2 for clinical variables and Table S4 for  
238 protein biomarkers significantly associated with mortality in the univariable analysis  
239 ( $p < 0.1$ ).

240 Multivariable Cox regression analysis identified lower IGFBP-3 levels (aHR 2.08; 95%CI  
241 1.24-3.48) at 90 days and lower MMP-9 levels (aHR 1.98; 95%CI 1.19-3.32) at 180 days  
242 as independent predictors of mortality. The models had an AUC of 0.83 at 90 days and  
243 0.81 at 180 days (Figure 1c, d and Table 3).

244 Top 10 predictors of 90-day mortality identified by random forest algorithms included  
245 NIHSS score, ICH volume, age, TLC, intraventricular extension, RBS, potassium, UCH-L1,  
246 hemoglobin, and APO-C1 (Figure 2c). Top 10 predictors of 180-day mortality included  
247 NIHSS score, ICH volume, age, TLC, intraventricular extension, UCH-L1, MMP-9,  
248 potassium, MMP-2, and RBS (Figure 2d).

249

## 250 **Internal validation of prediction models**

251 Five-fold cross-validation and bootstrapping revealed that prediction models  
252 constructed with the random forest algorithm outperformed multivariable logistic and  
253 Cox regression in predicting poor outcomes at 180-day and mortality at both time points.  
254 However, there was a marginal difference in the mean AUC values of regression models  
255 and random forest models for predicting 90-day poor outcomes (Table 4, Figure S1).

256

## 257 **Validation of previous ICH prediction models**

258 We validated previously published ICH prediction scores, including ICH score, MICH  
259 score, ICH-FOS score, and ICH-GS score. These scores had AUCs ranging from 0.80 to 0.86  
260 for predicting poor outcomes at 90 days and from 0.76 to 0.84 at 180 days. For mortality  
261 prediction, the AUCs ranged from 0.78 to 0.81 at 90 days and from 0.76 to 0.80 at 180  
262 days. Adding biomarkers to the prediction models in this study improved the prediction  
263 of poor outcomes compared to previous models, but no difference was noted in models  
264 predicting mortality (Table 5).

265

## 266 **Interaction network and enrichment analyses**

267 In univariable analysis, we analyzed a protein network of 10 biomarkers linked to poor  
268 outcomes and mortality post-ICH. This network featured ten biomarkers (nodes) with  
269 eight interactions (edges), including six highly connected biomarkers. MMP-9 displayed  
270 the highest degree of interaction, connecting with four other proteins. In our network, 7  
271 out of 8 interactions had a score exceeding 0.80, with the most robust interaction score  
272 of 0.96 between MMP-2 and IGFBP-3 (Figure S2). The significant pathways encompassed  
273 negative regulation of catalytic activity, protein metabolic processes, extracellular space,  
274 and extracellular matrix disassembly (Table S5).

275

## 276 **Discussion**

277 Our analysis reaffirms the relevance of established clinical variables in predicting poor  
278 outcomes and mortality in ICH, including age, GCS score, ICH volume, NIHSS score, and  
279 various laboratory investigations, underscoring their significance in clinical practice  
280 [16,17]. Furthermore, our analyses of 22 protein biomarkers and clinical features noted  
281 in 24 hours post-ICH revealed UCH-L1, alpha-2-macroglobulin, Serpin A11, and MMP-2  
282 as independent predictors of poor outcome. IGFBP-3 and MMP-9 independently  
283 predicted mortality following ICH. Machine learning-based random forest models  
284 identified additional predictors, including haptoglobin for poor outcomes and UCH-L1,  
285 APO-C1, and MMP-2 for mortality prediction. Integrating protein biomarkers to clinical  
286 prediction models may enhance the precision of risk assessment and resource allocation  
287 in stroke prevention programs [18], promoting more efficient resource allocation  
288 targeting individuals most likely to develop ICH.

289 Our study reveals inconsistent optimal values for sensitivity and specificity in biomarker  
290 cutoffs from univariable analyses (Tables S3 and S4). This emphasizes the need to  
291 consider multiple biomarkers and their cutoff values for improved accuracy and  
292 reliability in ICH outcome prediction.

293 This study, conducted in a tertiary care center in India, holds particular significance due  
294 to the diverse demographic, genetic, and environmental factors unique to the Indian  
295 population. Understanding stroke in this context contributes to a more holistic  
296 understanding of the disease and its multifaceted risk factors, which is vital as India and  
297 many other developing nations face an increasing burden of stroke [19]. These findings  
298 can be pivotal in shaping stroke treatment and outcome prognostication strategies  
299 unique to India and similar resource-limited settings.

300 UCH-L1's association with poor outcomes in ICH suggests its potential as an early  
301 neurological damage marker [20]. Alpha-2-macroglobulin's role in predicting poor  
302 outcomes in ICH, previously unexplored, may relate to its involvement in protease  
303 inhibition and inflammation regulation [21]. Serpin A11's anti-inflammatory and anti-  
304 fibrotic properties may signify a response to mitigate damage after ICH [22]. IGFBP-3's  
305 downregulation in ICH could reflect a compromised injury response [23]. The role of  
306 APO-C1 and haptoglobin in ICH prognostication, reported for the first time in our study,  
307 requires further investigation.

308 MMP-2 and MMP-9, implicated in tissue remodeling and inflammation [24], highlight  
309 extracellular matrix dynamics in ICH pathogenesis [25]. Indeed, our network and  
310 enrichment analyses underscored MMP-9's central role in ICH pathophysiology (Figure  
311 S2), particularly its involvement in extracellular matrix-related pathways influencing ICH  
312 outcomes (Table S6) [25]. MMP-9's association with short-term mortality but not poor  
313 functional outcomes aligns with previous Indian population findings [26], suggesting  
314 potential for MMP-9 inhibition as a neuroprotective strategy in ICH [27].

315 Prediction models are limited by the risk of overfitting to the training data, potentially  
316 compromising their generalizability. Cross-validation and bootstrapping address this by  
317 assessing model performance across different data subsets and testing stability through  
318 resampling. We, therefore, internally validated our findings through five-fold cross-  
319 validation and bootstrapping, demonstrating that random forest models consistently  
320 outperformed regression models in predicting 180-day poor outcome and 90-day and  
321 180-day mortality, as evidenced by higher AUC values (Table 4). This suggests that  
322 machine learning algorithms, with their ability to capture complex interactions and  
323 patterns, offer a valuable tool for enhancing prognostic accuracy in ICH [28,29].

324 We also validated the performance of previously published prediction scores for ICH  
325 outcomes (Table S5). Our study, demonstrated higher AUC values for poor outcome  
326 predictions compared to the existing prediction scores. This suggests that integrating  
327 novel protein biomarkers and clinical features in our model enhances the precision of  
328 risk assessment for ICH outcomes.

329 The choice of outcomes in this study emphasizes the importance of patient-reported  
330 outcome measures (PROMs) and quality of life in stroke research and care [30]. While  
331 many clinical trials prioritize mortality as the primary outcome, it's essential to  
332 acknowledge that survival alone may not fully represent the patient's overall well-being  
333 or quality of life [31]. Rankin 4-5 indicates significant disability, and for many patients,  
334 this level of impairment can be as debilitating as death itself. Rankin 3 signifies moderate  
335 disability that can significantly affect a patient's independence and quality of life. By  
336 consolidating mRS scores 3-6, our study essentially encompasses all patients  
337 experiencing death or significant disability.

338 Compared to previous studies, our study has several strengths. Firstly, we utilized a  
339 targeted proteomics approach, specifically multiple reaction monitoring, for precise and  
340 sensitive measurement of protein biomarkers. Secondly, we recruited patients within the  
341 24-hour window, a critical period for stroke management, allowing earlier biomarker  
342 assessment than prior studies [26,32]. Thirdly, our study had minimal loss to follow-up  
343 (<5%).

344 However, our study also has several limitations. Firstly, the small sample size warrants  
345 external validation of these biomarkers in adequately powered studies. However, we  
346 internally validated our dataset and obtained consistent AUCs across the outcome  
347 measures. Secondly, our study only included patients from a single center, limiting its  
348 generalizability. Thirdly, focusing on a 24-hour time window may not capture the full ICH

349 progression, necessitating earlier biomarker measurements [33,34] and exploring  
350 temporal changes. Lastly, we provided relative quantification data for protein  
351 biomarkers, suggesting the need for obtaining absolute quantification values in future  
352 studies.

353

### 354 **Conclusion**

355 These data reflect outcomes in developing nations underscoring the potential of serum  
356 biomarkers, in conjunction with clinical variables, to enhance outcome prediction in ICH  
357 patients. Biomarkers like UCH-L1, alpha-2-macroglobulin, Serpin A11, MMP-2, IGFBP-3,  
358 and MMP-9 showed strong associations with outcomes, improving model accuracy. With  
359 better performance of random forest-based machine learning models, proteomic data  
360 holds promise for ICH prognostication. Future research should examine temporal profiles  
361 of these biomarkers in larger cohorts and explore additional pathways using multi-omics  
362 platforms to refine predictive models for ICH prognosis.

363

### 364 **Competing Interests**

365 The authors have declared that no competing interests exist.

366

### 367 **Acknowledgements**

368 S. Misra was a DST-INSPIRE Fellow supported by Department of Science and Technology,  
369 Government of India.

370

### 371 **Study Funding**

372 This study was supported in part by the AIIMS Intramural Research Grant (F. No. 8-  
373 762/A-762/2019/RS).



374

### 375 **Ethics Approval**

376 The study was approved by the local institutional ethics committee of AIIMS, New Delhi  
377 (Ref. No. IECPG-395/28.09.2017). We obtained written informed consent from all the  
378 recruited patients or their legally authorized representatives prior to collecting blood  
379 samples and clinical history.

380

381 **Author Contributions:** DV conceptualized the idea of this research topic, helped design  
382 the clinical methodology, and supervised each step of execution of this study. SM  
383 primarily conducted each step of this study ranging from blood sample collection,  
384 processing, proteomic experimentation, statistical and proteomic data analysis, building  
385 prediction models, results interpretation, and manuscript writing. YK conducted the  
386 machine learning analysis. SSG supervised the proteomic experimentation and its data  
387 analysis. SM and PS conducted the proteomic experiments and data analysis. ZR  
388 contributed in conducting the proteomic experimentations in the study. MN contributed  
389 in patient sample collection and processing. AK, PK, and NKM helped in statistical data  
390 analysis. DV, PA, AKS, AKP, DM, and KP aided in patient recruitment for this study. All  
391 authors contributed to the article and approved the submitted version.

392

## 393 References

- 394 1. Tsao CW, Aday AW, Almarzooq ZI, Anderson CAM, Arora P, Avery CL, et al. Heart  
395 Disease and Stroke Statistics-2023 Update: A Report From the American Heart  
396 Association. *Circulation*. 2023;147: e93–e621.  
397 doi:10.1161/CIR.0000000000001123
- 398 2. An SJ, Kim TJ, Yoon B-W. Epidemiology, Risk Factors, and Clinical Features of  
399 Intracerebral Hemorrhage: An Update. *J Stroke*. 2017;19: 3–10.  
400 doi:10.5853/jos.2016.00864
- 401 3. Pandian JD, Padma Srivastava MV, Aaron S, Ranawaka UK, Venketasubramanian N,  
402 Sebastian IA, et al. The burden, risk factors and unique etiologies of stroke in  
403 South-East Asia Region (SEAR). *Lancet Reg Health Southeast Asia*. 2023;17:  
404 100290. doi:10.1016/j.lansea.2023.100290
- 405 4. Gregório T, Pipa S, Cavaleiro P, Atanásio G, Albuquerque I, Chaves PC, et al.  
406 Prognostic models for intracerebral hemorrhage: systematic review and meta-  
407 analysis. *BMC Med Res Methodol*. 2018;18: 145. doi:10.1186/s12874-018-0613-8
- 408 5. Wartenberg KE, Hwang DY, Haeusler KG, Muehlschlegel S, Sakowitz OW, Madžar D,  
409 et al. Gap Analysis Regarding Prognostication in Neurocritical Care: A Joint  
410 Statement from the German Neurocritical Care Society and the Neurocritical Care  
411 Society. *Neurocrit Care*. 2019;31: 231–244. doi:10.1007/s12028-019-00769-6
- 412 6. Troiani Z, Ascanio L, Rossitto CP, Ali M, Mohammadi N, Majidi S, et al. Prognostic  
413 Utility of Serum Biomarkers in Intracerebral Hemorrhage: A Systematic Review.  
414 *Neurorehabil Neural Repair*. 2021;35: 946–959.  
415 doi:10.1177/15459683211041314
- 416 7. Misra S, Singh P, Sengupta S, Kushwaha M, Rahman Z, Bhalla D, et al. Subtyping  
417 strokes using blood-based biomarkers: A proteomics approach. medRxiv; 2023. p.  
418 2023.06.10.23291233. doi:10.1101/2023.06.10.23291233
- 419 8. Misra S, Singh P, Nath M, Bhalla D, Sengupta S, Kumar A, et al. Blood-based protein  
420 biomarkers for the diagnosis of acute stroke: A discovery-based SWATH-MS  
421 proteomic approach. *Front Neurol*. 2022;13: 989856.  
422 doi:10.3389/fneur.2022.989856
- 423 9. Seymour SL, Hunter CL. ProteinPilot™ Software overview. : 5.
- 424 10. Desiere F, Deutsch EW, King NL, Nesvizhskii AI, Mallick P, Eng J, et al. The  
425 PeptideAtlas project. *Nucleic Acids Res*. 2006;34: D655-658.  
426 doi:10.1093/nar/gkj040
- 427 11. Wilkins MR, Gasteiger E, Bairoch A, Sanchez JC, Williams KL, Appel RD, et al.  
428 Protein identification and analysis tools in the ExPASy server. *Methods Mol Biol*.  
429 1999;112: 531–552. doi:10.1385/1-59259-584-7:531
- 430 12. Zhang H, Liu Q, Zimmerman LJ, Ham A-JL, Slebos RJC, Rahman J, et al. Methods for  
431 peptide and protein quantitation by liquid chromatography-multiple reaction

- 432 monitoring mass spectrometry. *Mol Cell Proteomics*. 2011;10: M110.006593.  
433 doi:10.1074/mcp.M110.006593
- 434 13. MacLean B, Tomazela DM, Shulman N, Chambers M, Finney GL, Frewen B, et al.  
435 Skyline: an open source document editor for creating and analyzing targeted  
436 proteomics experiments. *Bioinformatics*. 2010;26: 966–968.  
437 doi:10.1093/bioinformatics/btq054
- 438 14. Collins GS, Reitsma JB, Altman DG, Moons KGM, TRIPOD Group. Transparent  
439 reporting of a multivariable prediction model for individual prognosis or diagnosis  
440 (TRIPOD): the TRIPOD statement. The TRIPOD Group. *Circulation*. 2015;131: 211–  
441 219. doi:10.1161/CIRCULATIONAHA.114.014508
- 442 15. Perez-Riverol Y, Csordas A, Bai J, Bernal-Llinares M, Hewapathirana S, Kundu DJ, et  
443 al. The PRIDE database and related tools and resources in 2019: improving support  
444 for quantification data. *Nucleic Acids Res*. 2019;47: D442–D450.  
445 doi:10.1093/nar/gky1106
- 446 16. Hemphill JC, Bonovich DC, Besmertis L, Manley GT, Johnston SC. The ICH score: a  
447 simple, reliable grading scale for intracerebral hemorrhage. *Stroke*. 2001;32: 891–  
448 897. doi:10.1161/01.str.32.4.891
- 449 17. Morotti A, Phuah C-L, Anderson CD, Jessel MJ, Schwab K, Ayres AM, et al. Leukocyte  
450 Count and Intracerebral Hemorrhage Expansion. *Stroke*. 2016;47: 1473–1478.  
451 doi:10.1161/STROKEAHA.116.013176
- 452 18. Mishra NK, Khadilkar SV. Stroke program for India. *Ann Indian Acad Neurol*.  
453 2010;13: 28–32. doi:10.4103/0972-2327.61273
- 454 19. GBD 2016 Lifetime Risk of Stroke Collaborators, Feigin VL, Nguyen G, Cercy K,  
455 Johnson CO, Alam T, et al. Global, Regional, and Country-Specific Lifetime Risks of  
456 Stroke, 1990 and 2016. *N Engl J Med*. 2018;379: 2429–2437.  
457 doi:10.1056/NEJMoa1804492
- 458 20. Yu W-H, Wang W-H, Dong X-Q, Du Q, Yang D-B, Shen Y-F, et al. Prognostic  
459 significance of plasma copeptin detection compared with multiple biomarkers in  
460 intracerebral hemorrhage. *Clin Chim Acta*. 2014;433: 174–178.  
461 doi:10.1016/j.cca.2014.03.014
- 462 21. Vandooren J, Itoh Y. Alpha-2-Macroglobulin in Inflammation, Immunity and  
463 Infections. *Front Immunol*. 2021;12: 803244. doi:10.3389/fimmu.2021.803244
- 464 22. Yan B, Luo L, Liu L, Wang Z, Chen R, Wu Y, et al. Serpin family proteins as potential  
465 biomarkers and therapeutic drugs in stroke: A systematic review and meta-  
466 analysis on clinical/preclinical studies. *CNS Neurosci Ther*. 2023;29: 1738–1749.  
467 doi:10.1111/cns.14205
- 468 23. Siddiqui EM, Mehan S, Bhalla S, Shandilya A. Potential role of IGF-1/GLP-1 signaling  
469 activation in intracerebral hemorrhage. *Curr Res Neurobiol*. 2022;3: 100055.  
470 doi:10.1016/j.crneur.2022.100055

- 471 24. Misra S, Talwar P, Kumar A, Kumar P, Sagar R, Vibha D, et al. Association between  
472 matrix metalloproteinase family gene polymorphisms and risk of ischemic stroke:  
473 A systematic review and meta-analysis of 29 studies. *Gene*. 2018;672: 180–194.  
474 doi:10.1016/j.gene.2018.06.027
- 475 25. Li H, Ghorbani S, Ling C-C, Yong VW, Xue M. The extracellular matrix as modifier of  
476 neuroinflammation and recovery in ischemic stroke and intracerebral hemorrhage.  
477 *Neurobiol Dis*. 2023;186: 106282. doi:10.1016/j.nbd.2023.106282
- 478 26. Sagar R, Kumar A, Verma V, Yadav AK, Raj R, Rawat D, et al. Incremental Accuracy  
479 of Blood Biomarkers for Predicting Clinical Outcomes After Intracerebral  
480 Hemorrhage. *J Stroke Cerebrovasc Dis*. 2021;30: 105537.  
481 doi:10.1016/j.jstrokecerebrovasdis.2020.105537
- 482 27. Dang B, Duan X, Wang Z, He W, Chen G. A Therapeutic Target of Cerebral  
483 Hemorrhagic Stroke: Matrix Metalloproteinase- 9. *Curr Drug Targets*. 2017;18:  
484 1358–1366. doi:10.2174/1389450118666170427151657
- 485 28. Guo R, Zhang R, Liu R, Liu Y, Li H, Ma L, et al. Machine Learning-Based Approaches  
486 for Prediction of Patients' Functional Outcome and Mortality after Spontaneous  
487 Intracerebral Hemorrhage. *J Pers Med*. 2022;12: 112. doi:10.3390/jpm12010112
- 488 29. Fernandez-Lozano C, Hervella P, Mato-Abad V, Rodríguez-Yáñez M, Suárez-Garaboa  
489 S, López-Dequidt I, et al. Random forest-based prediction of stroke outcome. *Sci*  
490 *Rep*. 2021;11: 10071. doi:10.1038/s41598-021-89434-7
- 491 30. Reeves M, Lisabeth L, Williams L, Katzan I, Kapral M, Deutsch A, et al. Patient-  
492 Reported Outcome Measures (PROMs) for Acute Stroke: Rationale, Methods and  
493 Future Directions. *Stroke*. 2018;49: 1549–1556.  
494 doi:10.1161/STROKEAHA.117.018912
- 495 31. Heneghan C, Goldacre B, Mahtani KR. Why clinical trial outcomes fail to translate  
496 into benefits for patients. *Trials*. 2017;18: 122. doi:10.1186/s13063-017-1870-2
- 497 32. Ebinger M, Ipsen N, Leonards CO, Empl L, Hanne L, Liman T, et al. Circulating  
498 insulin-like growth factor binding protein-3 predicts one-year outcome after  
499 ischemic stroke. *Exp Clin Endocrinol Diabetes*. 2015;123: 461–465. doi:10.1055/s-  
500 0035-1554632
- 501 33. Misra S, Kumar A, Kumar P, Yadav AK, Mohania D, Pandit AK, et al. Blood-based  
502 protein biomarkers for stroke differentiation: A systematic review. *Proteomics Clin*  
503 *Appl*. 2017;11. doi:10.1002/prca.201700007
- 504 34. Misra S, Montaner J, Ramiro L, Arora R, Talwar P, Nath M, et al. Blood biomarkers  
505 for the diagnosis and differentiation of stroke: A systematic review and meta-  
506 analysis. *Int J Stroke*. 2020;15: 704–721. doi:10.1177/1747493020946157
- 507 35. Cho D-Y, Chen C-C, Lee W-Y, Lee H-C, Ho L-H. A new Modified Intracerebral  
508 Hemorrhage score for treatment decisions in basal ganglia hemorrhage--a  
509 randomized trial. *Crit Care Med*. 2008;36: 2151–2156.  
510 doi:10.1097/CCM.0b013e318173fc99

- 511 36. Ji R, Shen H, Pan Y, Wang P, Liu G, Wang Y, et al. A novel risk score to predict 1-year  
512 functional outcome after intracerebral hemorrhage and comparison with existing  
513 scores. *Crit Care*. 2013;17: R275. doi:10.1186/cc13130
- 514 37. Ruiz-Sandoval JL, Chiquete E, Romero-Vargas S, Padilla-Martínez JJ, González-  
515 Cornejo S. Grading scale for prediction of outcome in primary intracerebral  
516 hemorrhages. *Stroke*. 2007;38: 1641–1644. doi:10.1161/STROKEAHA.106.478222
- 517

518 **Figure Legends**

519

520 **Figure 1:** ROC curves to predict (a) 90-day poor outcome, (b) 180-day poor outcome, (c)  
521 90-day mortality, and (d) 180-day mortality in multivariable analysis of ICH patients.

522

523 **Figure 2:** Absolute mean Shapely values calculated for random forest-based machine  
524 learning algorithms to predict (a) 90-day poor outcome, (b) 180-day poor outcome, (c)  
525 90-day mortality, and (d) 180-day mortality in ICH.

526

527 **Figure 3:** ROC curves for five-fold cross validation of multivariable regression models to  
528 predict (a) 90-day poor outcome, (b) 180-day poor outcome, (c) 90-day mortality, and  
529 (d) 180-day mortality in ICH.

530

531 **Figure 4:** Protein-protein interaction network analysis of significant protein biomarkers  
532 that can predict poor functional outcome and mortality after ICH using the Cytoscape  
533 software. The colour of nodes and edges represents the degree of interaction and  
534 interaction score.

**Table 1:** Baseline characteristics and univariable analyses of poor outcomes at 90-day and 180-day after intracerebral hemorrhage.

| <b>Characteristics</b>                              | <b>90-day poor outcome (N=110)</b> | <b>90-day good outcome (N=39)</b> | <b>p-value</b> | <b>180-day poor outcome (N=97)</b> | <b>180-day good outcome (N=47)</b> | <b>p-value</b> |
|-----------------------------------------------------|------------------------------------|-----------------------------------|----------------|------------------------------------|------------------------------------|----------------|
| Age (years) <sup>a</sup>                            | 60 (50-66)                         | 48 (42-55)                        | <0.001         | 60 (50-66)                         | 50 (45-60)                         | 0.004          |
| Male <sup>b</sup>                                   | 66 (60)                            | 32 (82.05)                        | 0.02           | 58 (59.79)                         | 36 (76.60)                         | 0.05           |
| Female <sup>b</sup>                                 | 44 (40)                            | 7 (17.95)                         |                | 39 (40.21)                         | 11 (23.40)                         |                |
| Blood sampling time from onset (hours) <sup>a</sup> | 17 (12-20.3)                       | 17.5 (7.5-20)                     | 0.57           | 17.2 (12-20.3)                     | 16 (8-20)                          | 0.33           |
| Time taken to reach hospital (hours) <sup>a</sup>   | 4.71 (2.5-9)                       | 5 (1.5-9.83)                      | 0.70           | 4.5 (2.5-9)                        | 5 (1-9.8)                          | 0.55           |
| Any surgical procedure <sup>b</sup>                 | 25 (22.73)                         | 1 (2.56)                          | 0.02           | 24 (24.74)                         | 2 (4.26)                           | 0.008          |
| Antihypertensives <sup>b</sup>                      | 31 (28.18)                         | 12 (30.77)                        | 0.76           | 29 (29.90)                         | 11 (23.40)                         | 0.42           |
| ACE inhibitors <sup>b</sup>                         | 0                                  | 1 (2.56)                          | N.E.           | 0                                  | 1 (2.13)                           | N.E.           |
| ARB <sup>b</sup>                                    | 6 (5.45)                           | 3 (7.69)                          | 0.62           | 6 (6.19)                           | 3 (6.38)                           | 0.96           |
| Beta blockers <sup>b</sup>                          | 31 (28.18)                         | 13 (33.33)                        | 0.55           | 31 (31.96)                         | 13 (27.66)                         | 0.60           |
| Calcium channel blockers <sup>b</sup>               | 43 (39.09)                         | 22 (56.41)                        | 0.06           | 38 (39.18)                         | 24 (51.06)                         | 0.18           |
| Diuretics <sup>b</sup>                              | 66 (60)                            | 16 (41.03)                        | 0.04           | 58 (59.79)                         | 24 (51.06)                         | 0.32           |

|                                          |                |            |        |              |             |        |
|------------------------------------------|----------------|------------|--------|--------------|-------------|--------|
| Hypertension <sup>b</sup>                | 69 (62.73)     | 29 (74.36) | 0.19   | 65 (67.01)   | 29 (61.70)  | 0.53   |
| Diabetes <sup>b</sup>                    | 23 (20.91)     | 6 (15.38)  | 0.46   | 23 (23.71)   | 4 (8.51)    | 0.04   |
| Dyslipidemia <sup>b</sup>                | 9 (8.18)       | 1 (2.56)   | 0.25   | 9 (9.28)     | 1 (2.13)    | 0.15   |
| Myocardial Infarction <sup>b</sup>       | 1 (0.91)       | 1 (2.56)   | 0.46   | 1 (1.03)     | 1 (2.13)    | 0.61   |
| Atrial fibrillation <sup>b</sup>         | 3 (2.73)       | 0          | N.E.   | 2 (2.06)     | 0           | N.E.   |
| Current Smoking <sup>b</sup>             | 27 (24.55)     | 14 (35.90) | 0.17   | 23 (23.71)   | 16 (36.17)  | 0.19   |
| Mild alcohol intake <sup>b</sup>         | 9 (8.18)       | 4 (10.26)  | 0.69   | 8 (8.25)     | 5 (10.64)   | 0.64   |
| Moderate alcohol intake <sup>b</sup>     | 4 (3.64)       | 3 (7.69)   | 0.31   | 2 (2.06)     | 5 (10.64)   | 0.04   |
| Heavy alcohol intake <sup>b</sup>        | 8 (7.27)       | 7 (17.95)  | 0.07   | 7 (7.22)     | 6 (12.77)   | 0.28   |
| No Exercise <sup>b</sup>                 | 86 (78.18)     | 31 (79.49) | 0.86   | 76 (78.35)   | 37 (78.72)  | 0.96   |
| Low Education <sup>b</sup>               | 88 (80)        | 26 (66.67) | 0.09   | 79 (81.44)   | 32 (68.09)  | 0.08   |
| Low socio-economic status <sup>b</sup>   | 39 (35.45)     | 13 (33.33) | 0.81   | 32 (32.99)   | 17 (36.17)  | 0.71   |
| Obesity <sup>b</sup>                     | 12 (10.91)     | 6 (15.38)  | 0.46   | 11 (11.34)   | 6 (12.77)   | 0.80   |
| ICH Volume (ml) <sup>a</sup>             | 36 (22.2-58.2) | 15 (9-25)  | <0.001 | 37 (22.2-60) | 18 (9.5-35) | <0.001 |
| Intraventricular Hemorrhage <sup>b</sup> | 47 (42.73)     | 7 (17.95)  | 0.008  | 45 (46.39)   | 9 (19.15)   | 0.002  |
| Deep ICH <sup>b</sup>                    | 87 (79.09)     | 36 (92.31) | 0.07   | 79 (81.44)   | 39 (82.98)  | 0.82   |
| Lobar ICH <sup>b</sup>                   | 16 (14.55)     | 2 (5.13)   | 0.14   | 13 (13.40)   | 5 (10.64)   | 0.64   |



|                                              |                       |                      |        |                    |                     |        |
|----------------------------------------------|-----------------------|----------------------|--------|--------------------|---------------------|--------|
| SBP (mmHg) <sup>a</sup>                      | 177.5 (154-196)       | 170 (150-194)        | 0.72   | 180 (154-196)      | 170 (152-192)       | 0.13   |
| DBP (mmHg) <sup>a</sup>                      | 100 (88-110)          | 100 (90-113)         | 0.44   | 100 (88-112)       | 100 (90-110)        | 0.67   |
| NIHSS score at admission <sup>a</sup>        | 23 (15-28)            | 10 (8-14)            | <0.001 | 23 (18-28)         | 10 (7-15)           | <0.001 |
| GCS score at admission <sup>a</sup>          | 8 (5-11)              | 15 (11-15)           | <0.001 | 8 (4-11)           | 15 (11-15)          | <0.001 |
| mRS score at discharge <sup>a</sup>          | 5 (4-6)               | 4 (3-4)              | <0.001 | 5 (4-6)            | 4 (3-4)             | <0.001 |
| RBS (mg/dl) <sup>a</sup>                     | 155.21 (126-190)      | 142 (109-168)        | 0.02   | 152.14 (129-185)   | 152.14 (116-176.47) | 0.09   |
| TLC (10 <sup>3</sup> /μL) <sup>a</sup>       | 10540 (9100-13796.29) | 9440 (7990-11022.33) | 0.01   | 11000 (9300-14100) | 9500 (7700-10910)   | <0.001 |
| Hemoglobin (g/dl) <sup>a</sup>               | 12.66 (11.3-14.1)     | 13.6 (12.52-14.6)    | 0.12   | 12.61 (11.2-14.2)  | 13.54 (12.4-14.5)   | 0.09   |
| Platelets (10 <sup>3</sup> /μL) <sup>a</sup> | 172 (126.2-201.39)    | 200 (167-254)        | 0.09   | 177.67 (131-220)   | 177.67 (134-243)    | 0.87   |
| Blood Urea (mg%) <sup>a</sup>                | 35.5 (25-45)          | 27 (20-40.11)        | 0.13   | 39.62 (26-46.49)   | 28 (21-40.11)       | 0.008  |
| Creatinine (mg%) <sup>a</sup>                | 1 (0.8-1.4)           | 0.93 (0.7-1.2)       | 0.44   | 1.02 (0.83-1.5)    | 0.9 (0.7-1.1)       | 0.007  |
| Potassium (mM/L) <sup>a</sup>                | 4 (3.7-4.47)          | 3.84 (3.5-4.31)      | 0.14   | 4 (3.6-4.4)        | 3.9 (3.7-4.37)      | 0.66   |
| Sodium (mM/L) <sup>a</sup>                   | 139.13 (136-142)      | 139.2 (136-141)      | 0.72   | 139.1 (136-142)    | 139.5 (136-142)     | 0.79   |
| Total Bilirubin (mg%) <sup>a</sup>           | 0.75 (0.6-1.05)       | 0.8 (0.6-1)          | 0.73   | 0.75 (0.6-1.05)    | 0.75 (0.6-1.04)     | 0.91   |

a: Variables represented as Median (IQR), b: Variables represented as frequency (percentage).

**Table 2:** Baseline characteristics and univariable analyses of mortality at 90-day and 180-day after intracerebral hemorrhage.

| <b>Characteristics</b>                              | <b>90-day death<br/>(N=62)</b> | <b>90-day alive<br/>(N=87)</b> | <b>p-value</b> | <b>180-day death<br/>(N=67)</b> | <b>180-day alive<br/>(N=77)</b> | <b>p-value</b> |
|-----------------------------------------------------|--------------------------------|--------------------------------|----------------|---------------------------------|---------------------------------|----------------|
| Age (years) <sup>a</sup>                            | 62 (50-70)                     | 50 (45-60)                     | <0.001         | 62 (50-70)                      | 50 (45-60)                      | 0.001          |
| Male <sup>b</sup>                                   | 34 (54.84)                     | 64 (73.56)                     | 0.02           | 38 (56.72)                      | 56 (72.73)                      | 0.02           |
| Female <sup>b</sup>                                 | 28 (45.16)                     | 23 (26.44)                     |                | 29 (43.28)                      | 21 (27.27)                      |                |
| Blood sampling time from onset (hours) <sup>a</sup> | 17 (10-20.3)                   | 17 (9.5-20)                    | 0.78           | 17 (9.8-20.5)                   | 17 (11.5-20)                    | 0.74           |
| Time taken to reach hospital (hours) <sup>a</sup>   | 4.1 (2.3-8.5)                  | 5 (1.5-9.8)                    | 0.22           | 4.2 (2.3-8.5)                   | 5 (1.5-9.8)                     | 0.33           |
| Any surgical procedure <sup>b</sup>                 | 14 (22.58)                     | 12 (13.79)                     | 0.22           | 15 (22.39)                      | 11 (14.29)                      | 0.27           |
| Antihypertensives <sup>b</sup>                      | 16 (25.81)                     | 27 (31.03)                     | 0.41           | 18 (26.87)                      | 22 (28.57)                      | 0.52           |
| ACE inhibitors <sup>b</sup>                         | 0                              | 1 (1.15)                       | N.E.           | 0                               | 1 (1.30)                        | N.E.           |
| ARB <sup>b</sup>                                    | 3 (4.84)                       | 6 (6.90)                       | 0.60           | 4 (5.97)                        | 5 (6.49)                        | 0.86           |
| Beta blockers <sup>b</sup>                          | 15 (24.19)                     | 29 (33.33)                     | 0.33           | 19 (28.36)                      | 25 (32.47)                      | 0.73           |
| Calcium channel blockers <sup>b</sup>               | 22 (35.48)                     | 43 (49.43)                     | 0.12           | 24 (35.82)                      | 38 (49.35)                      | 0.11           |
| Diuretics <sup>b</sup>                              | 34 (54.84)                     | 48 (55.17)                     | 0.79           | 38 (56.72)                      | 44 (57.14)                      | 0.99           |
| Hypertension <sup>b</sup>                           | 41 (66.13)                     | 57 (65.52)                     | 0.87           | 46 (68.66)                      | 48 (62.34)                      | 0.69           |
| Diabetes <sup>b</sup>                               | 16 (25.81)                     | 13 (14.94)                     | 0.09           | 16 (23.88)                      | 11 (14.29)                      | 0.10           |

|                                          |                |               |        |                  |               |        |
|------------------------------------------|----------------|---------------|--------|------------------|---------------|--------|
| Dyslipidemia <sup>b</sup>                | 5 (8.06)       | 5 (5.75)      | 0.36   | 6 (8.96)         | 4 (5.19)      | 0.25   |
| Myocardial Infarction <sup>b</sup>       | 0              | 2 (2.30)      | N.E.   | 0                | 2 (2.60)      | N.E.   |
| Atrial fibrillation <sup>b</sup>         | 0              | 3 (3.45)      | N.E.   | 0                | 2 (2.60)      | N.E.   |
| Current Smoking <sup>b</sup>             | 13 (20.97)     | 28 (32.18)    | 0.15   | 16 (23.88)       | 23 (29.87)    | 0.36   |
| Mild alcohol intake <sup>b</sup>         | 4 (6.45)       | 9 (10.34)     | 0.34   | 4 (5.97)         | 9 (11.69)     | 0.25   |
| Moderate alcohol intake <sup>b</sup>     | 2 (3.23)       | 5 (5.75)      | 0.39   | 2 (2.99)         | 5 (6.49)      | 0.33   |
| Heavy alcohol intake <sup>b</sup>        | 2 (3.23)       | 13 (14.94)    | 0.05   | 2 (2.99)         | 11 (14.29)    | 0.04   |
| No Exercise <sup>b</sup>                 | 50 (80.65)     | 67 (77.01)    | 0.36   | 53 (79.10)       | 60 (77.92)    | 0.49   |
| Low Education <sup>b</sup>               | 52 (83.87)     | 62 (71.26)    | 0.12   | 55 (82.09)       | 56 (72.73)    | 0.22   |
| Low socio-economic status <sup>b</sup>   | 19 (30.65)     | 33 (37.93)    | 0.44   | 20 (29.85)       | 29 (37.66)    | 0.42   |
| Obesity <sup>b</sup>                     | 8 (12.90)      | 10 (11.49)    | 0.69   | 8 (11.94)        | 9 (11.69)     | 0.79   |
| ICH Volume (ml) <sup>a</sup>             | 40.4 (29.9-70) | 22 (10.75-40) | <0.001 | 39.2 (27.6-66.3) | 22 (10.8-40)  | <0.001 |
| Intraventricular Hemorrhage <sup>b</sup> | 35 (56.45)     | 19 (21.84)    | <0.001 | 37 (55.22)       | 17 (22.08)    | <0.001 |
| Deep ICH <sup>b</sup>                    | 48 (77.42)     | 75 (86.21)    | 0.14   | 53 (79.10)       | 65 (84.42)    | 0.24   |
| Lobar ICH <sup>b</sup>                   | 10 (16.13)     | 8 (9.20)      | 0.21   | 10 (14.93)       | 8 (10.39)     | 0.31   |
| SBP (mmHg) <sup>a</sup>                  | 170 (150-190)  | 180 (154-196) | 0.99   | 177 (150-196)    | 173 (154-194) | 0.53   |
| DBP (mmHg) <sup>a</sup>                  | 100 (87-110)   | 100 (90-120)  | 0.42   | 100 (87-110)     | 100 (90-113)  | 0.64   |

|                                              |                    |                     |        |                    |                     |        |
|----------------------------------------------|--------------------|---------------------|--------|--------------------|---------------------|--------|
| NIHSS score at admission <sup>a</sup>        | 24 (18-28)         | 15 (9-23)           | <0.001 | 24 (18-28)         | 14 (9-23)           | <0.001 |
| GCS score at admission <sup>a</sup>          | 7 (4-10)           | 13 (8-15)           | <0.001 | 7 (4-10)           | 13 (8-15)           | <0.001 |
| mRS score at discharge <sup>a</sup>          | 5 (5-6)            | 4 (4-5)             | <0.001 | 5 (4-6)            | 4 (4-5)             | <0.001 |
| RBS (mg/dl) <sup>a</sup>                     | 164.2 (136-193)    | 147 (116-172)       | <0.001 | 160 (130-191.7)    | 152.1 (120-173)     | <0.001 |
| TLC (10 <sup>3</sup> /μL) <sup>a</sup>       | 12000 (9700-15750) | 9900 (8400-11861.8) | <0.001 | 12000 (9700-15920) | 9900 (8418.9-11560) | <0.001 |
| Hemoglobin (g/dl) <sup>a</sup>               | 12.6 (11-14.2)     | 13.3 (12-14.3)      | 0.28   | 12.6 (11-14.2)     | 13.3 (12-14.2)      | 0.22   |
| Platelets (10 <sup>3</sup> /μL) <sup>a</sup> | 177.7 (126.2-222)  | 184 (137.6-235)     | 0.54   | 177.7 (126.2-223)  | 177.7 (137.6-229.4) | 0.98   |
| Blood Urea (mg%) <sup>a</sup>                | 40.06 (24-46)      | 30 (23-42.88)       | 0.04   | 40 (24-46)         | 30 (23-42)          | 0.03   |
| Creatinine (mg%) <sup>a</sup>                | 1 (0.8-1.5)        | 1 (0.7-1.2)         | 0.10   | 1 (0.8-1.5)        | 0.9 (0.7-1.2)       | 0.07   |
| Potassium (mM/L) <sup>a</sup>                | 4.1 (3.8-4.5)      | 3.9 (3.5-4.3)       | 0.11   | 4 (3.8-4.5)        | 3.9 (3.6-4.3)       | 0.18   |
| Sodium (mM/L) <sup>a</sup>                   | 138.9 (136-141.5)  | 139.6 (136-142)     | 0.34   | 139 (136-141.5)    | 139.6 (136-142)     | 0.35   |
| Total Bilirubin (mg%) <sup>a</sup>           | 0.8 (0.6-1)        | 0.8 (0.6-1)         | 0.68   | 0.8 (0.6-1)        | 0.8 (0.6-1)         | 0.94   |

a: Variables represented as Median (IQR), b: Variables represented as frequency (percentage).

**Table 3:** Multivariable prediction models to predict poor outcome and mortality after Intracerebral Hemorrhage

| Predictor variables                      | OR (95% CI)        | P-value | Predictor variables                      | HR (95% CI)      | P-value |
|------------------------------------------|--------------------|---------|------------------------------------------|------------------|---------|
| <b>90-day poor outcome</b>               |                    |         | <b>90-day mortality</b>                  |                  |         |
| <b>AUC/c-statistic: 0.95 (0.92-0.98)</b> |                    |         | <b>AUC/c-statistic: 0.83 (0.76-0.89)</b> |                  |         |
| Age                                      | 1.12 (1.06-1.19)   | <0.001  | RBS                                      | 1.01 (1.00-1.01) | <0.001  |
| NIHSS score                              | 1.21 (1.10-1.33)   | <0.001  | NIHSS score                              | 1.07 (1.03-1.12) | 0.002   |
| ICH volume                               | 1.08 (1.03-1.12)   | 0.001   | IGFBP-3 (<16.48)                         | 2.08 (1.24-3.48) | 0.005   |
| UCH-L1 (<13.85)                          | 9.23 (2.41-35.33)  | 0.001   | IVH                                      | 1.90 (1.10-3.28) | 0.02    |
| A2M (>17.87)                             | 5.57 (1.26-24.59)  | 0.02    | Age                                      | 1.03 (1.00-1.05) | 0.03    |
| Serpin A11 (>11.36)                      | 9.33 (1.09-79.94)  | 0.04    | Creatinine                               | 1.38 (1.03-1.85) | 0.03    |
| <b>180-day poor outcome</b>              |                    |         | <b>180-day mortality</b>                 |                  |         |
| <b>AUC/c-statistic: 0.92 (0.88-0.96)</b> |                    |         | <b>AUC/c-statistic: 0.81 (0.74-0.87)</b> |                  |         |
| NIHSS score                              | 1.26 (1.16-1.36)   | <0.001  | NIHSS score                              | 1.08 (1.03-1.12) | <0.001  |
| Creatinine                               | 10.44 (2.26-48.32) | 0.003   | RBS                                      | 1.01 (1.00-1.01) | 0.005   |
| MMP-2 (>18.72)                           | 6.32 (1.82-21.90)  | 0.004   | MMP-9 (<15.99)                           | 1.98 (1.19-3.32) | 0.009   |
| Age                                      | 1.06 (1.01-1.10)   | 0.02    | TLC                                      | 1.00 (1.00-1.00) | 0.01    |
| Diabetes                                 | 6.69 (1.40-31.94)  | 0.02    | ICH volume                               | 1.01 (1.00-1.01) | 0.03    |

|                  |                   |      |  |
|------------------|-------------------|------|--|
| Moderate alcohol | 0.06 (0.004-0.79) | 0.03 |  |
|------------------|-------------------|------|--|

90-day poor outcome adjusted for age, gender, any surgical procedure, CCB, diuretic, heavy alcohol, low education, ICH volume, IVH, Deep ICH, NIHSS, RBS, TLC, HP, UCH-L1, A2M, and Serpin A11.

180-day poor outcome adjusted for age, gender, any surgical procedure, diabetes, moderate alcohol, low education, ICH volume, IVH, NIHSS, TLC, RBS, hemoglobin, blood urea, creatinine, A2M, MINPP-1, MMP-2, and UCH-L1.

90-day mortality adjusted for age, gender, diabetes, heavy alcohol, ICH volume, IVH, NIHSS, TLC, RBS, blood urea, creatinine, APO-C1, IGFBP3, and UCH-L1.

180-day mortality adjusted for age, gender, diabetes, heavy alcohol, ICH volume, IVH, NIHSS, TLC, RBS, blood urea, creatinine, APO-C1, UCH-L1, and MMP-9.

**Table 4:** Five-fold cross validation and bootstrapping for internal validation of prediction models

| <b>Outcome measures</b> | <b>Logistic regression (mean AUC of 5-fold cross validation)</b> | <b>Random Forest (mean AUC of 5-fold cross validation)</b> |
|-------------------------|------------------------------------------------------------------|------------------------------------------------------------|
| 90-day poor outcome     | 0.90 (0.88-0.97)                                                 | 0.89 (0.81-0.91)                                           |
| 180-day poor outcome    | 0.87 (0.88-0.97)                                                 | 0.89 (0.85-0.95)                                           |
| 90-day mortality        | 0.78 (0.68-0.95)                                                 | 0.81 (0.73-0.89)                                           |
| 180-day mortality       | 0.76 (0.68-0.86)                                                 | 0.81 (0.78-0.85)                                           |

**Table 5:** Validation of previously published ICH prediction scores.

| S. No | Prediction score   | 90-day poor outcome,<br>AUC (95% CI) | 180-day poor outcome,<br>AUC (95% CI) | 90-day mortality,<br>AUC (95% CI) | 180-day mortality,<br>AUC (95% CI) |
|-------|--------------------|--------------------------------------|---------------------------------------|-----------------------------------|------------------------------------|
| 1.    | ICH score [16]     | 0.81 (0.74-0.88)                     | 0.78 (0.71-0.86)                      | 0.80 (0.73-0.87)                  | 0.80 (0.72-0.87)                   |
| 2.    | MICH score [35]    | 0.83 (0.77-0.90)                     | 0.80 (0.73-0.87)                      | 0.81 (0.73-0.88)                  | 0.80 (0.73-0.87)                   |
| 3.    | ICH-FOS score [36] | 0.86 (0.79-0.92)                     | 0.84 (0.77-0.91)                      | 0.80 (0.73-0.87)                  | 0.80 (0.73-0.87)                   |
| 4.    | ICH-GS score [37]  | 0.80 (0.73-0.88)                     | 0.76 (0.67-0.84)                      | 0.78 (0.71-0.85)                  | 0.76 (0.68-0.84)                   |
| 5.    | Present study      | 0.90 (0.88-0.97)                     | 0.87 (0.88-0.97)                      | 0.78 (0.68-0.95)                  | 0.76 (0.68-0.86)                   |

**Abbreviations-** ICH: Intracerebral hemorrhage; MICH- modified Intracerebral hemorrhage; ICH-FOS: Intracerebral hemorrhage- Functional Outcome Score; ICH-GS: intracerebral hemorrhage Grading Scale; AUC: Area Under the Curve; CI: Confidence Interval.

The present study's AUCs include the internally validated 5-fold cross validation AUC values from logistic regression.

**ICH score:** Glasgow coma scale (GCS) (15-13= 0; 12-5= 1; 4-3= 2), ICH volume (<30 cm<sup>3</sup> = 0; ≥30 cm<sup>3</sup> = 1), presence of intraventricular hemorrhage (IVH) (no = 0; yes = 1), infratentorial origin (no = 0; yes = 1), age (<80 = 0; ≥80 = 1).

**MICH score:** GCS (15-13= 0; 12-5= 1; 4-3= 2), ICH volume (≤20 cm<sup>3</sup> = 0; 21-50 cm<sup>3</sup> = 1; ≥51 cm<sup>3</sup> = 2), presence of IVH or hydrocephalus (no = 0; yes = 1).

**ICH-FOS score:** age (≤59 = 0; 60-69 = 1; 70-79 = 2; ≥80 = 4), NIH Stroke Scale (NIHSS) (0-5 = 0; 6-10 = 2; 11-15 = 3; 16-20 = 4; ≥21 = 5), GCS (15-13 = 0; 12-9 = 1; 8-3 = 2), admission glucose (≤11.0 mmol/L = 0; ≥11.1 mmol/L = 1), ICH volume for supratentorial origin (<40 cm<sup>3</sup> = 0; 40-70 cm<sup>3</sup> = 2; >70 cm<sup>3</sup> = 2), ICH volume for infratentorial origin (<10 cm<sup>3</sup> = 0; 10-20 cm<sup>3</sup> = 2; >20 cm<sup>3</sup> = 2), IVH (no = 0; yes = 1).

**ICH-GS score:** age (<45 = 1; 45-64 = 2; ≥65 = 3), GCS (15-13 = 1, 12-9 = 2, 8-3 = 3), ICH location (supratentorial = 1; infratentorial = 2), ICH volume (for supratentorial origin: <40 cm<sup>3</sup> = 1; 40-70 cm<sup>3</sup> = 2; >70 cm<sup>3</sup> = 3; for infratentorial origin: <10 cm<sup>3</sup> = 1; 10-20 cm<sup>3</sup> = 2; >20 cm<sup>3</sup> = 3).



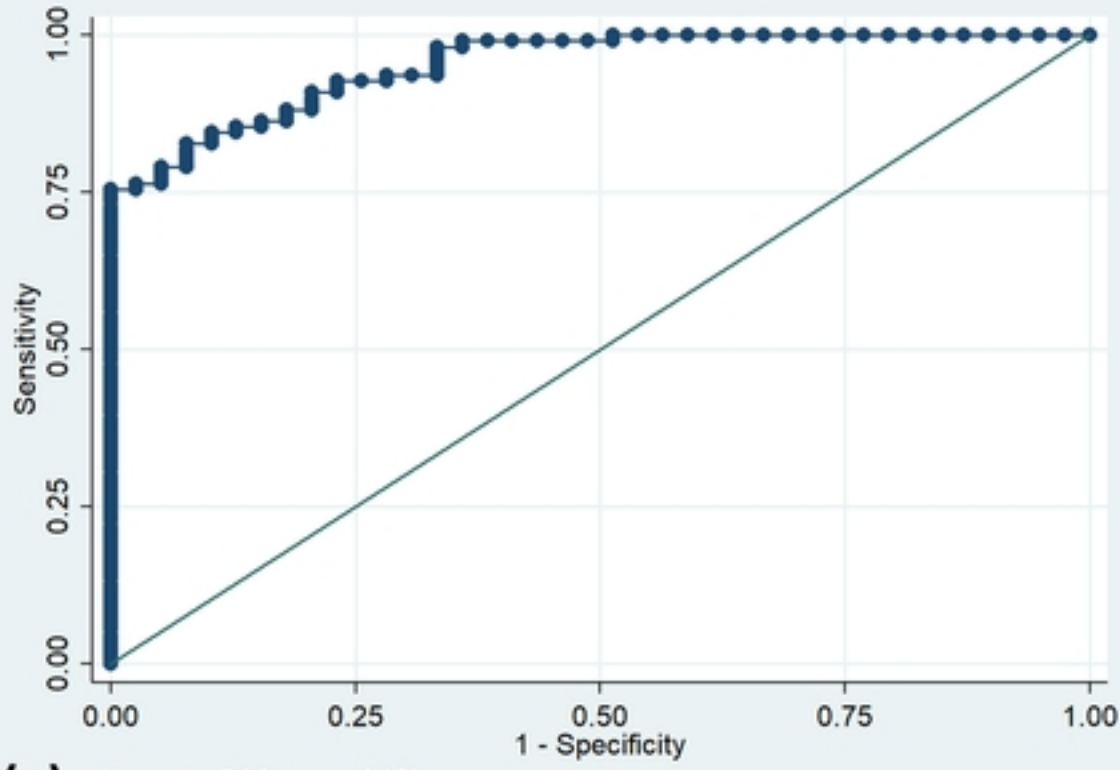

(a) Area under ROC curve = 0.9524

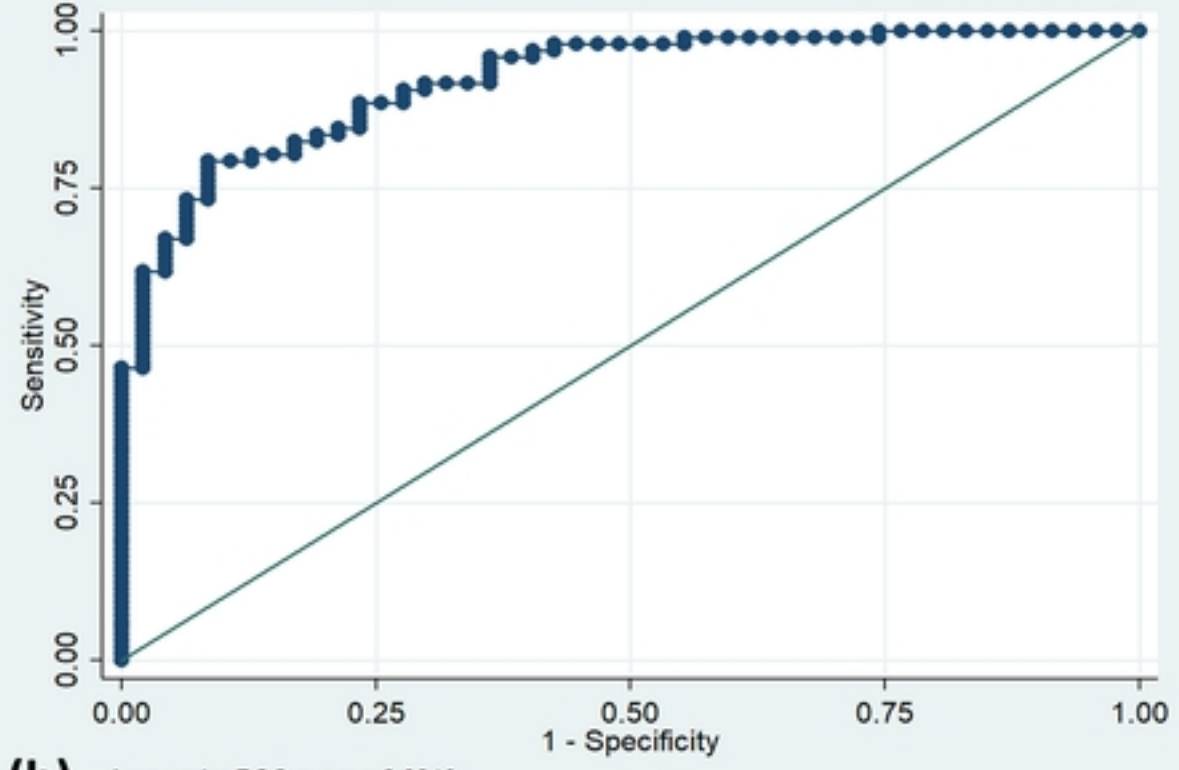

(b) Area under ROC curve = 0.9210

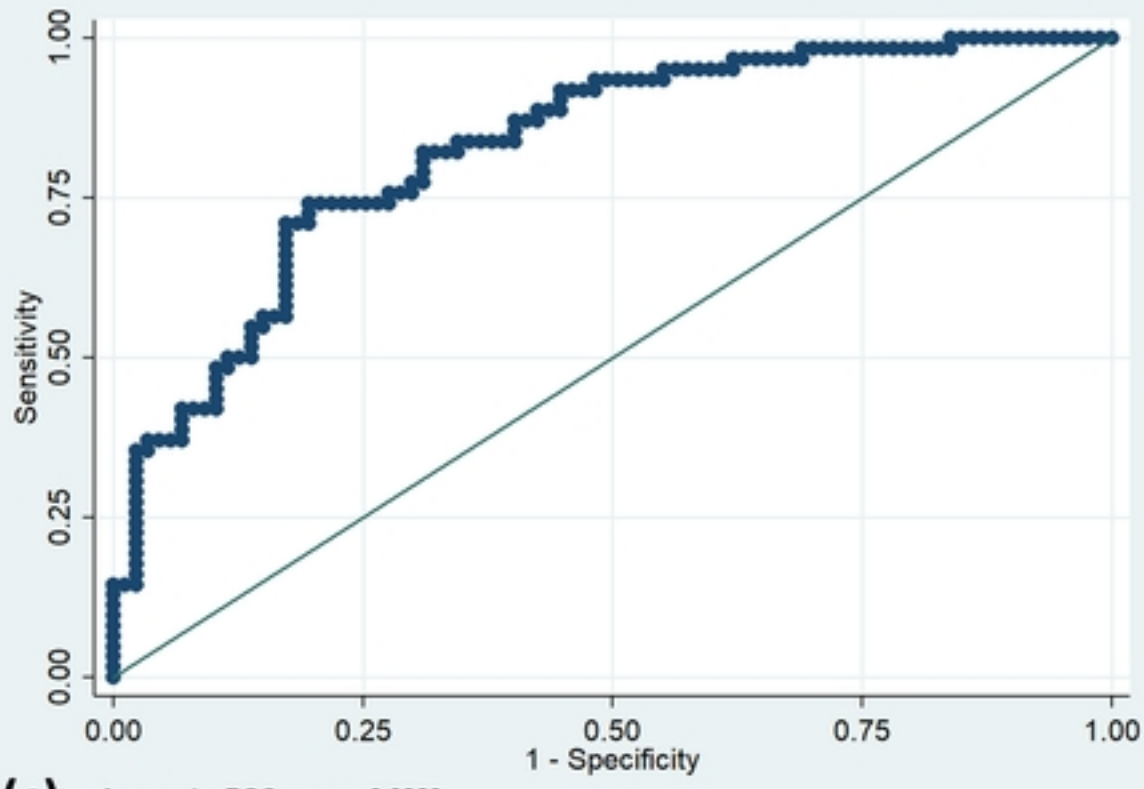

(c) Area under ROC curve = 0.8268

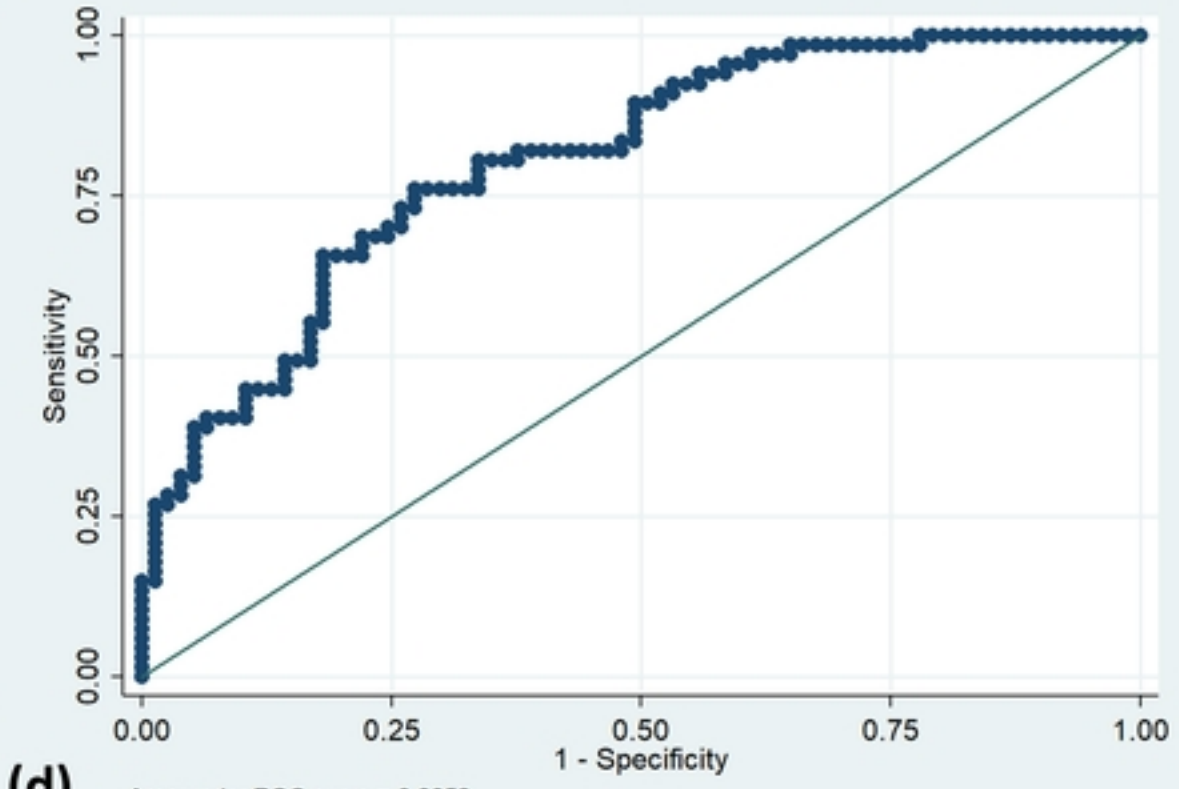

(d) Area under ROC curve = 0.8052

Figure 1

medRxiv preprint doi: <https://doi.org/10.1101/2023.12.22.23300465>; this version posted December 28, 2023. The copyright holder for this preprint (which was not certified by peer review) is the author/funder, who has granted medRxiv a license to display the preprint in perpetuity.

It is made available under a [CC-BY 4.0 International license](https://creativecommons.org/licenses/by/4.0/).

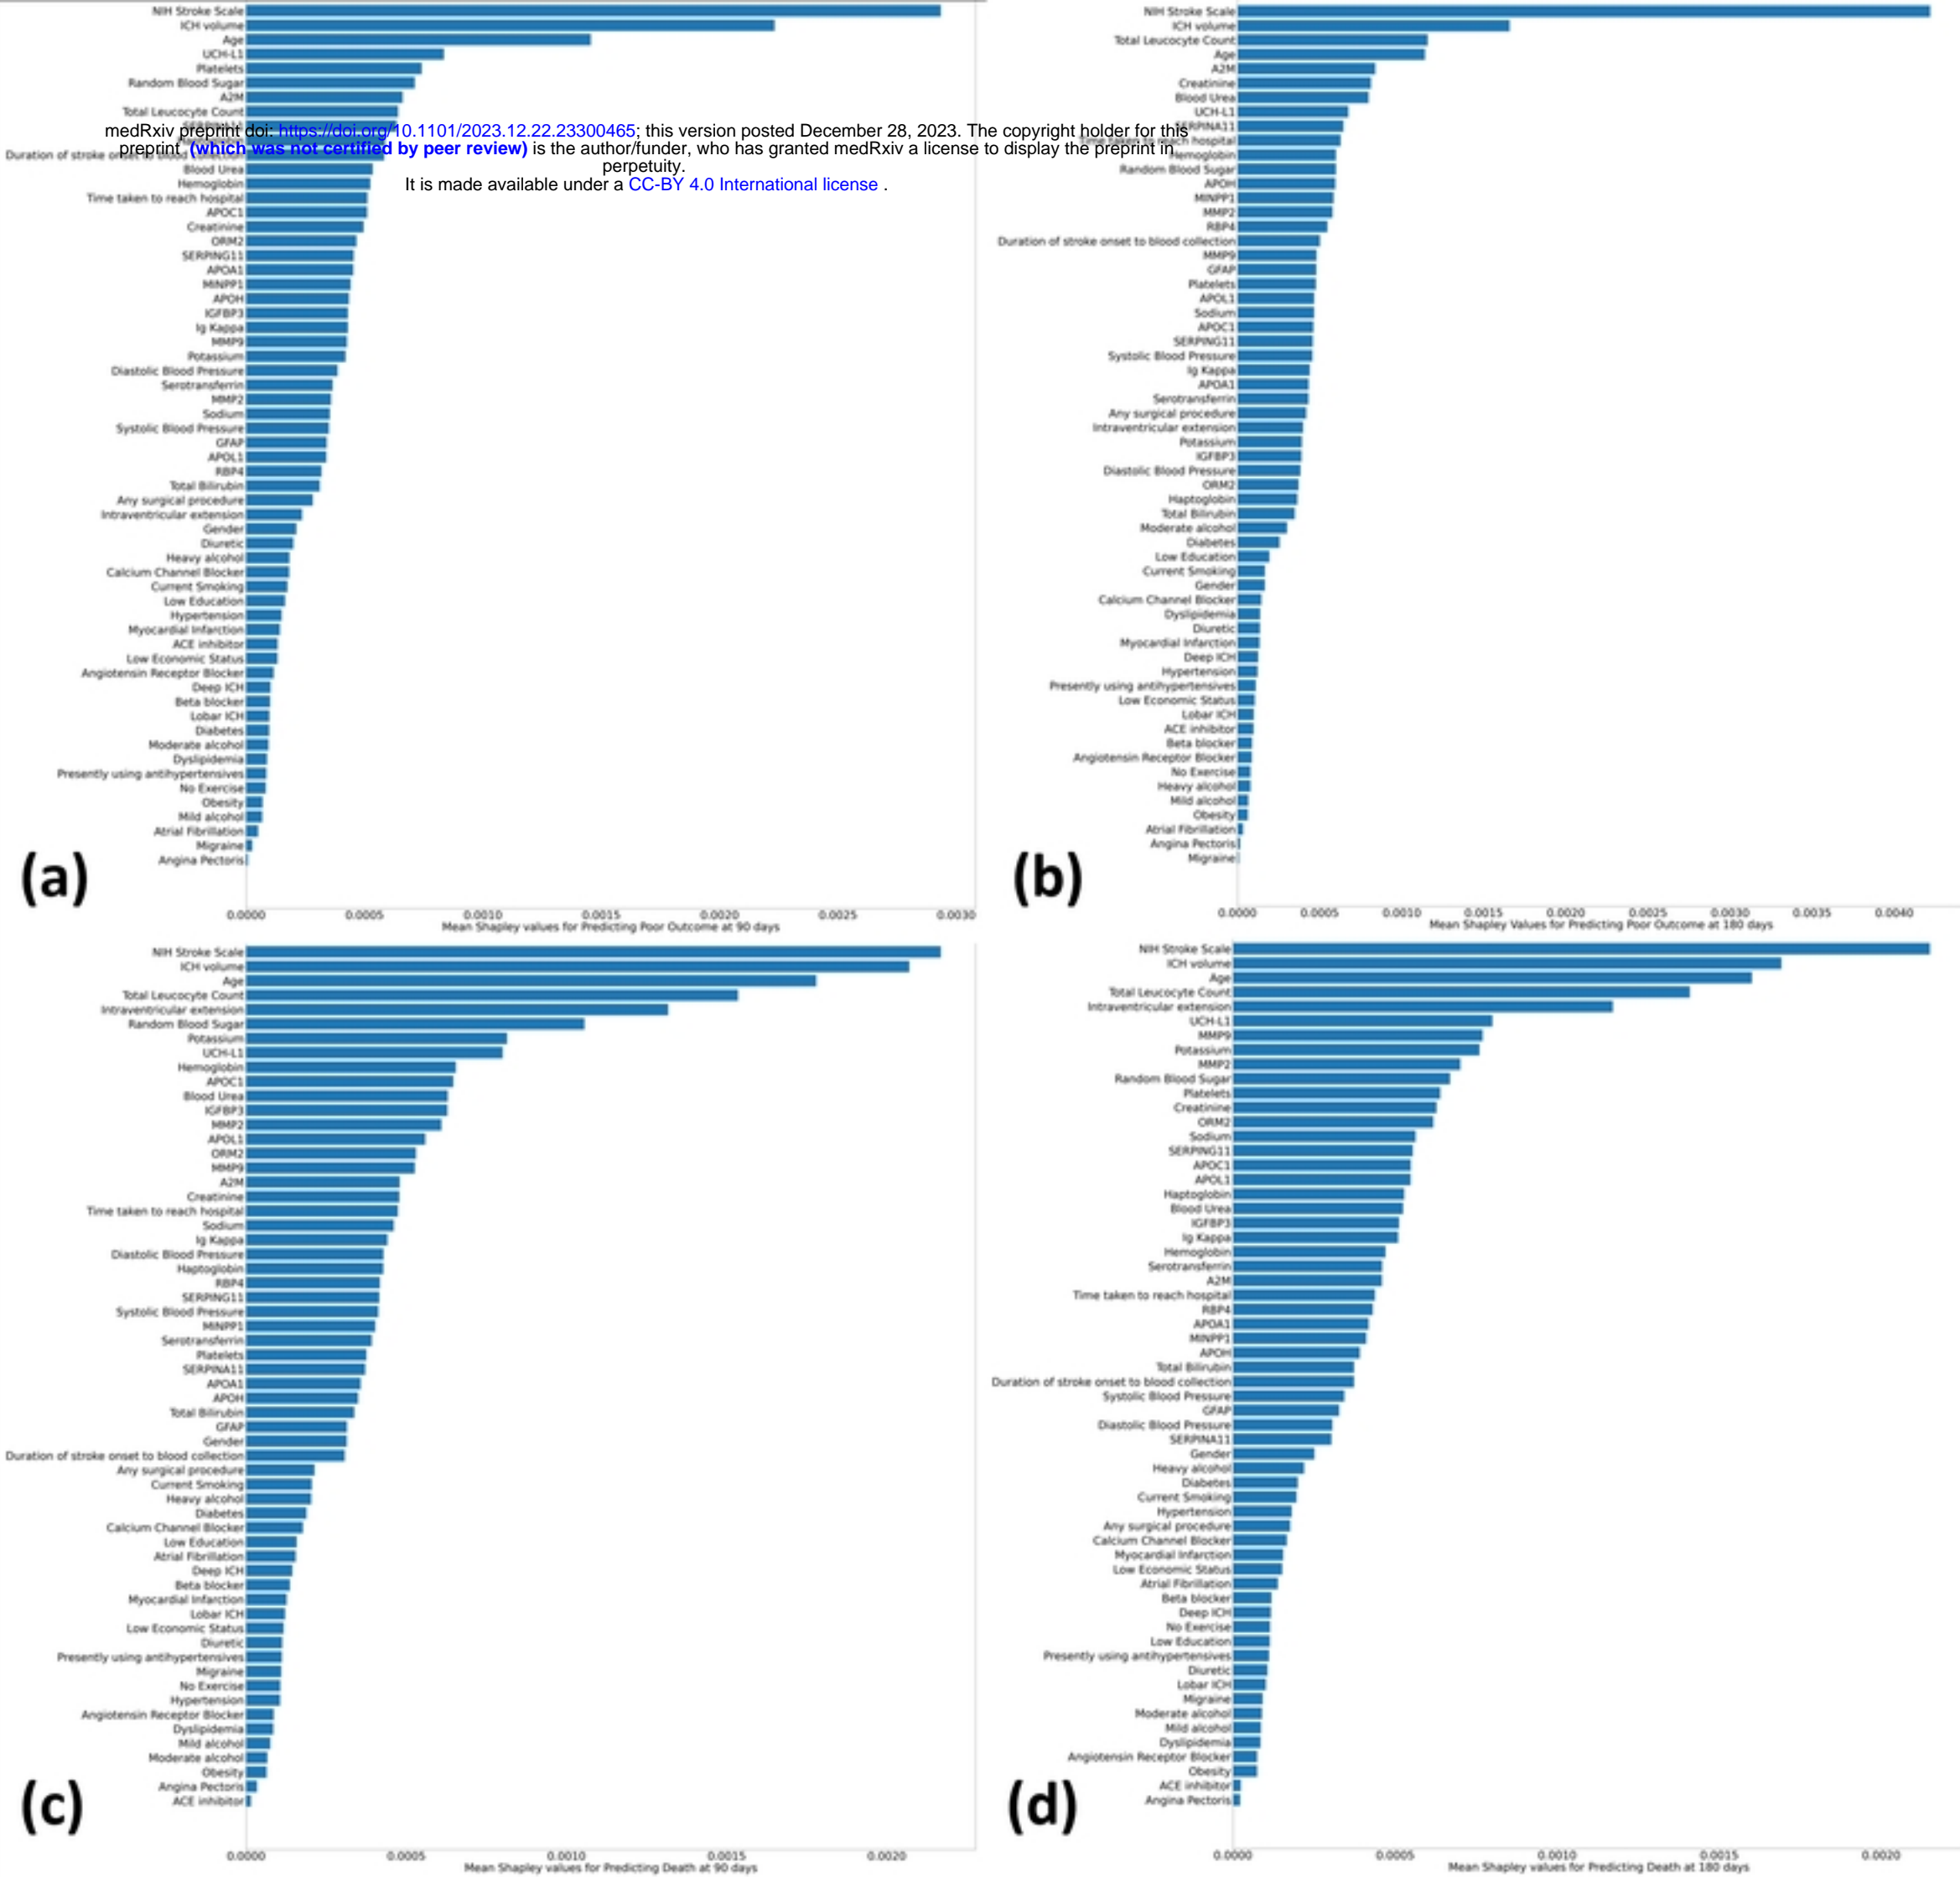

Figure 2

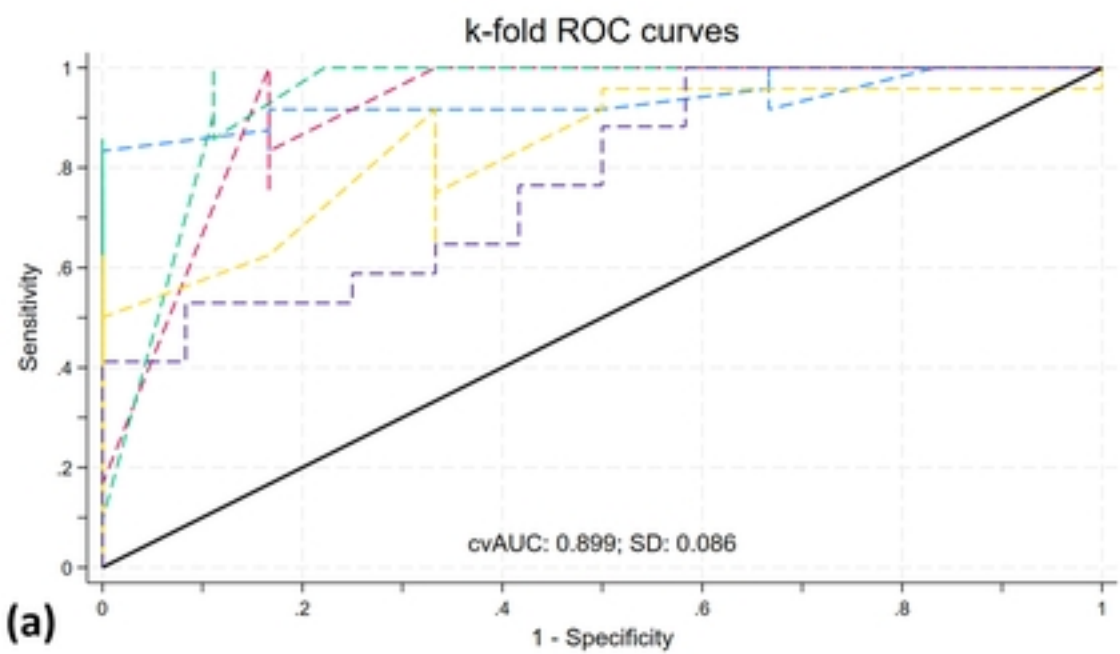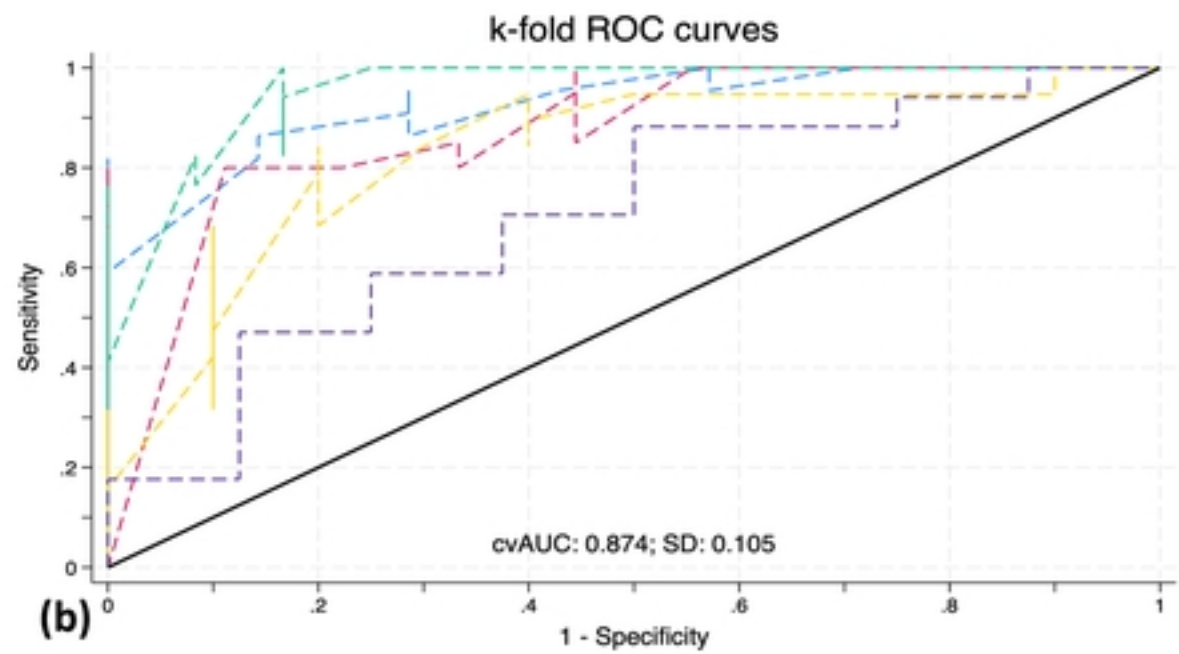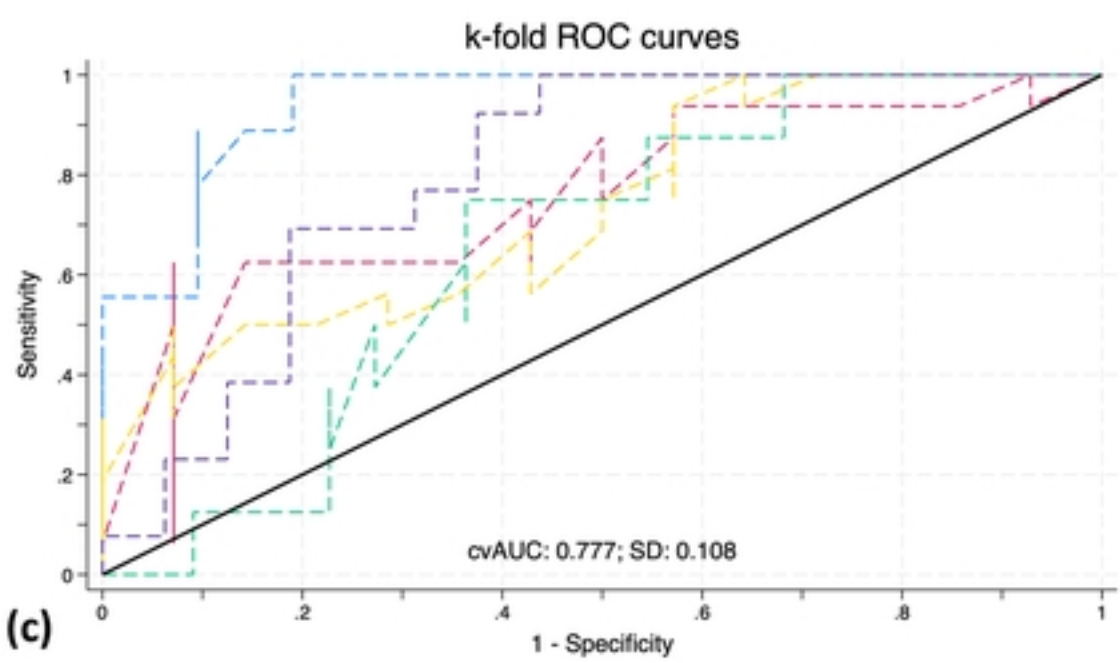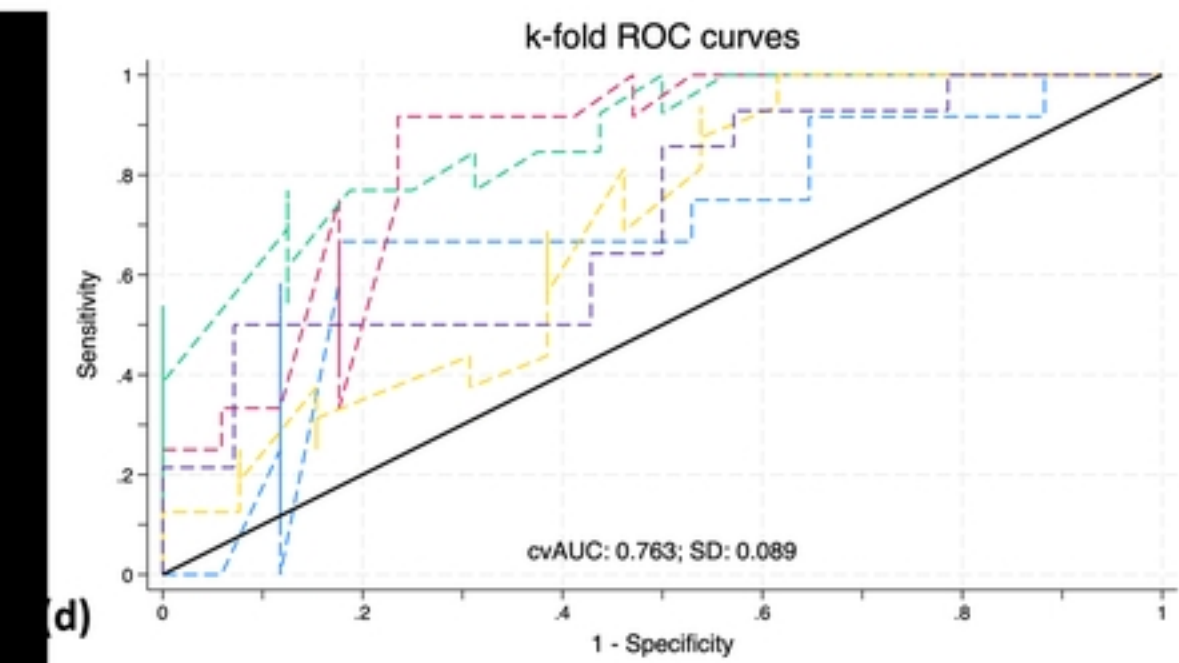

Figure 3

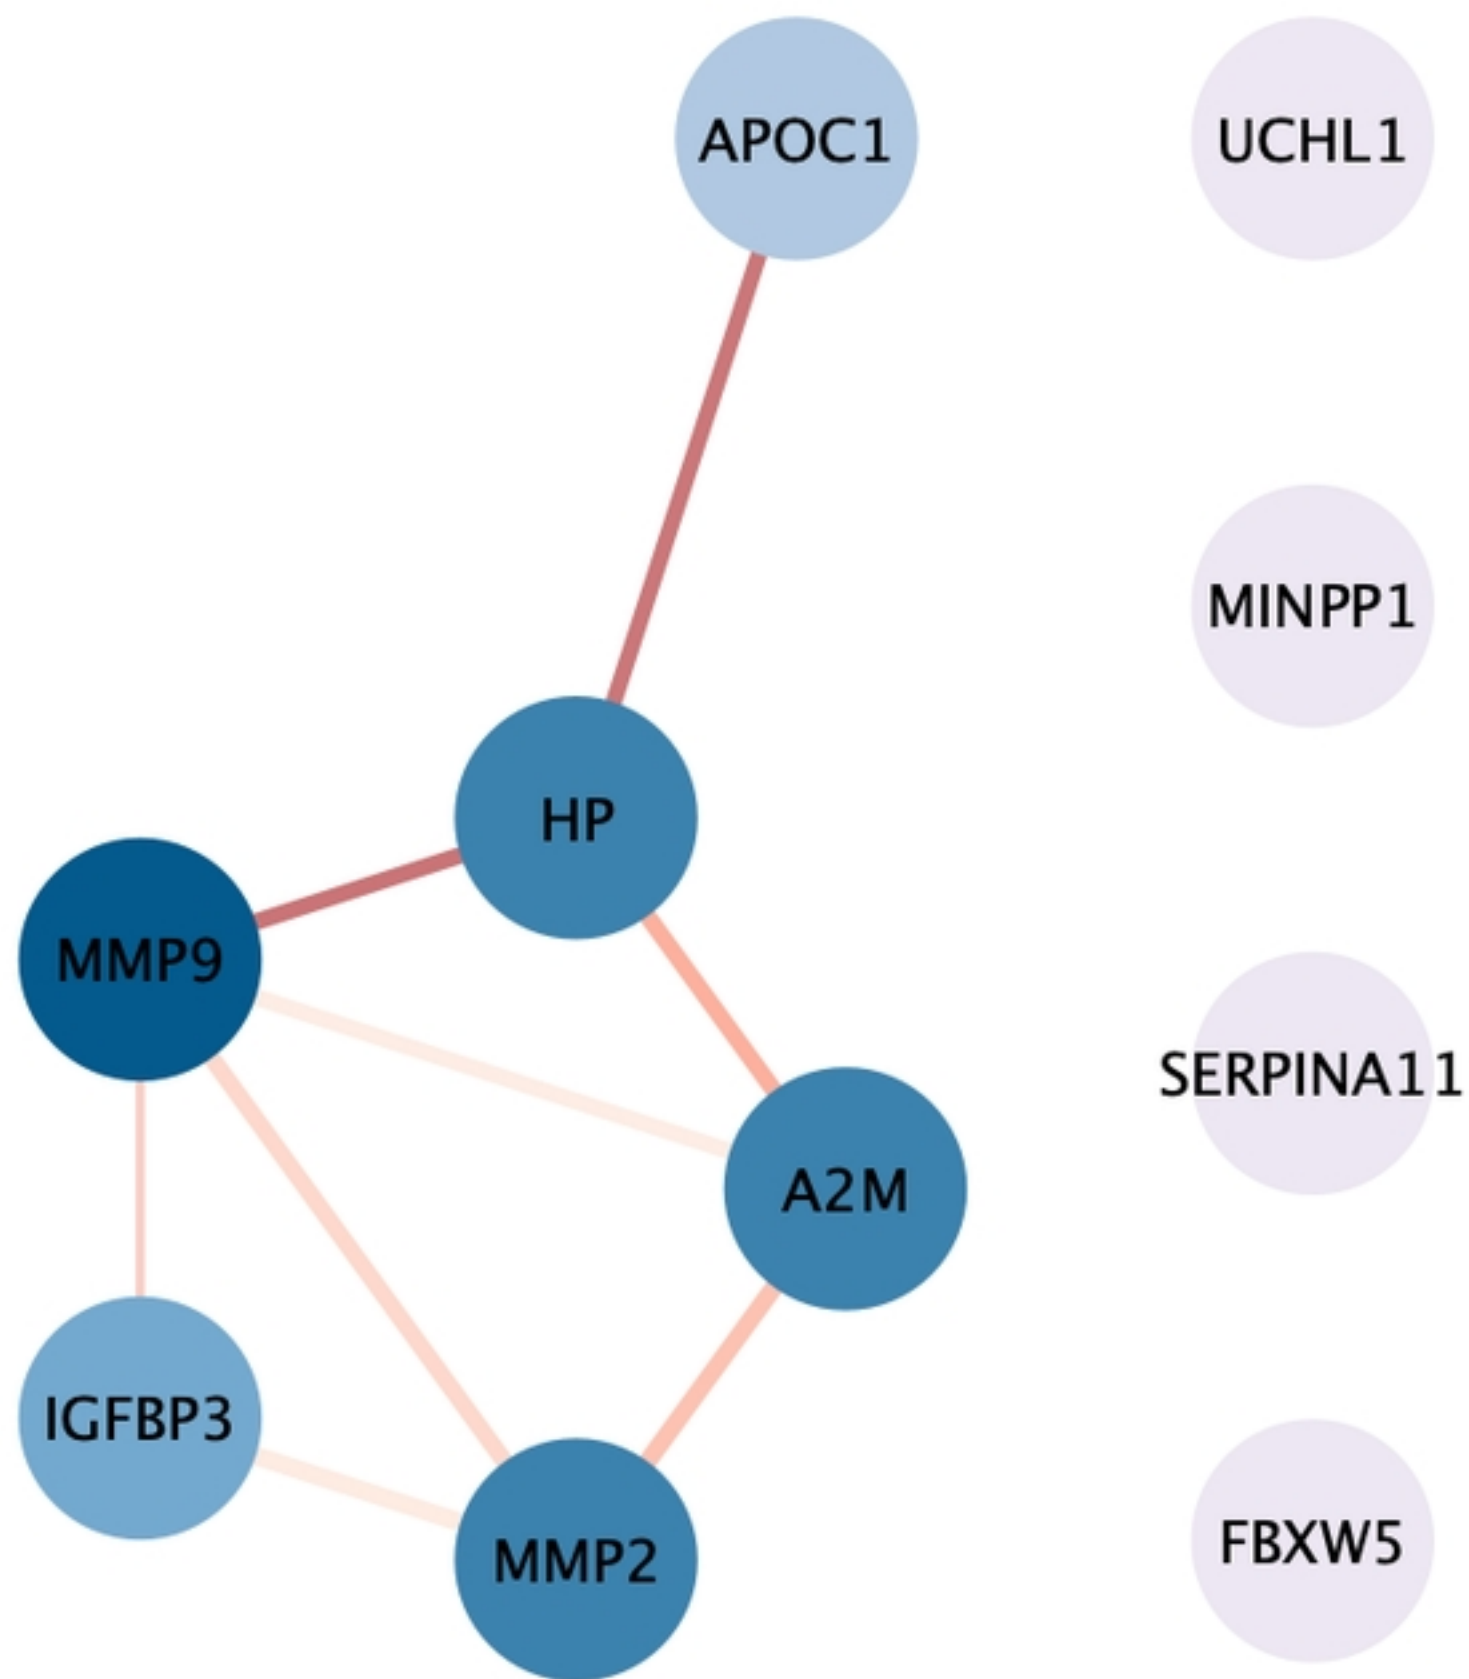

Figure 4
